# Supplementary material for: Concise synthesis of semicarbazides and formylhydrazines via direct addition reaction between aromatic azoarenes and N-substituted formamides
Source: Royal Society of Chemistry journal article supplement (doi:10.1039/c4ra17015f), 2015-01-01

## Supporting Materials

### Concise Synthesis of Semicarbazides and Formylhydrazines via Direct Addition Reaction between Aromatic Azoarenes and *N*- Substituted Formamides

Defu Liu<sup>1</sup>, Jincheng Mao,<sup>1,2\*</sup>Guangwei Rong<sup>1</sup>, Hong Yan<sup>1</sup>, Yang Zheng<sup>1</sup>, Jie Chen<sup>1</sup>

<sup>1</sup>Key Laboratory of Organic Synthesis of Jiangsu Province College of Chemistry,  
Chemical Engineering and Materials Science, Soochow University, Suzhou 215123,  
P. R. Chin

<sup>b</sup>State Key Laboratory of Oil and Gas Reservoir Geology and Exploitation, Southwest  
Petroleum University, Chengdu 610500, P. R. China

jcmiao@suda.edu.cn

### Content

|                                                                                        |       |
|----------------------------------------------------------------------------------------|-------|
| Experimental Section-----                                                              | 2-4   |
| Characterization of the corresponding products-----                                    | 5-11  |
| X-ray crystallographic data for compound <b>4a</b> -----                               | 12    |
| Copy of <sup>1</sup> H and <sup>13</sup> C NMR Spectra for Corresponding Products----- | 20-42 |

## Experimental Section

### General Information:

All reactions were carried out under an air atmosphere condition. Azobenzene was purchased from Sinopharm Chemical Reagent Co., Ltd, other Aromatic azo compounds were prepared using literature procedure<sup>1-3</sup>. Various Formamides and various Oxidants and other chemicals were purchased from Aldrich, Acros or Alfa. Column chromatography was generally performed on silica gel (100-200 mesh) and reactions were monitored by thin layer chromatography (TLC) using UV light (254 nm) to visualize the course of the reactions. The <sup>1</sup>H (400 MHz) and <sup>13</sup>C NMR (100 MHz) data were recorded on Varian 400 M spectrometers using CDCl<sub>3</sub> as solvent. The chemical shifts ( $\delta$ ) are reported in ppm and coupling constants ( $J$ ) in Hz. <sup>1</sup>H NMR spectra was recorded with tetramethylsilane ( $\delta = 0.00$  ppm) as internal reference; <sup>13</sup>C NMR spectra was recorded with CDCl<sub>3</sub> ( $\delta = 77.500$  ppm) as internal reference. ESI-MS and HRMS were performed by the State-authorized Analytical Center in Soochow University.

### Optimization

Optimization of reaction conditions for the reaction of azobenzene with DMF<sup>[a]</sup>

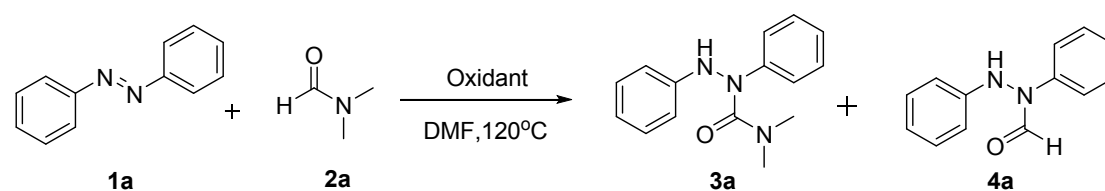

| Entry          | Oxidant   | Additive (equiv) | Yield of 3a [%] <sup>b</sup> | Yield of 4a [%] <sup>b</sup> |
|----------------|-----------|------------------|------------------------------|------------------------------|
| 1 <sup>c</sup> | DTBP(2eq) | –                | 19                           | NR                           |
| 2              | DTBP      | –                | 25                           | NR                           |
| 3 <sup>d</sup> | DTBP(6eq) | –                | 24                           | NR                           |
| 4              | DTBP      | PhCOCl           | 31                           | 17                           |
| 5              | DCP       | PhCOCl           | trace                        | 60                           |
| 6              | TBHP      | PhCOCl           | 10                           | 14                           |
| 7              | BQ        | PhCOCl           | trace                        | trace                        |

|                 |      |                        |                         |     |       |
|-----------------|------|------------------------|-------------------------|-----|-------|
| 8               | DCP  | PhCH <sub>2</sub> COCl | –                       | 25  | 30    |
| 9               | DCP  | PhCH <sub>2</sub> Cl   | –                       | 30  | 22    |
| 10              | DCP  | POBr <sub>3</sub>      | –                       | 13  | 40    |
| 11              | DTBP | PhCOCl                 | I <sub>2</sub> (0.2)    | 47  | trace |
| 12              | DTBP | PhCOCl                 | NaI (0.2)               | 57  | trace |
| 13              | DTBP | PhCOCl                 | KI (0.2)                | 51  | trace |
| 14              | DTBP | PhCOCl                 | TBAI (0.2)              | 51  | trace |
| 15              | DTBP | PhCH <sub>2</sub> COCl | NaI (0.2)               | 40  | trace |
| 16              | DTBP | PhCH <sub>2</sub> Cl   | NaI (0.2)               | 38  | trace |
| 17              | DTBP | POBr <sub>3</sub>      | NaI (0.2)               | 52  | trace |
| 18              | DTBP | SOCl <sub>2</sub>      | NaI (0.2)               | 27  | trace |
| 19 <sup>e</sup> | DTBP | PhCOCl                 | NaI (0.2)               | 65  | trace |
| 20 <sup>f</sup> | DTBP | PhCOCl                 | NaI (0.2)               | 42  | trace |
| 21              | DCP  | PhCOCl                 | imidazole (1.0)         | 10  | 68    |
| 22              | DCP  | PhCOCl                 | 2-methylimidazole (1.0) | <10 | 55    |
| 23              | DCP  | PhCOCl                 | 4-methylimidazole (1.0) | <10 | 43    |
| 24              | DCP  | PhCOCl(40%)            | imidazole (1.0)         | 15  | 30    |
| 25              | DCP  | PhCOCl(10%)            | imidazole (1.0)         | 14  | 44    |

<sup>a</sup> Catalytic conditions: azobenzene (0.5 mmol), oxidant (2 mmol, 4 eq), PhCOCl (20 mol%), DMF (2 mL), 120 °C, 24 h, air. <sup>b</sup> Yield of isolated product. <sup>c</sup> DTBP 2eq. <sup>d</sup>DTBP 6eq <sup>e</sup>PhCOCl (40 mol%). <sup>f</sup>PhCOCl (10 mol%).

### General Procedure for preparation of semicarbazides through the addition

**Reaction between aromatic azoarenes and *N*-substituted formamides:** To a reaction tube equipped with a magnetic stir bar was added under air, azoarene (0.5 mmol), NaI (20 mol%), DTBP (4 equiv) and PhCOCl (40 mol%) in DMF (2 mL). The resulting reaction mixture was kept stirring at 120 °C for 24 h. At the end of the reaction, the reaction mixture was cooled to room temperature. After removal of the solvent, the residue was subjected to column chromatography on silica gel using ethyl acetate and petroleum ether mixtures to afford the desired product in high purity.

### General Procedure for Preparation of formylhydrazines through the addition

**Reaction between aromatic azoarenes and *N*-substituted formamides:** To a reaction tube equipped with a magnetic stir bar was added under air, azoarene (0.5

mmol), imidazole (1 equiv), DCP (4 equiv) and PhCOCl (20 mol%) in DMF (2 mL). The resulting reaction mixture was kept stirring at 120 °C for 24 h. At the end of the reaction, the reaction mixture was cooled to room temperature. After removal of the solvent, the residue was subjected to column chromatography on silica gel using ethyl acetate and petroleum ether mixtures to afford the desired product in high purity.

## Characterization of the corresponding products:

### *N,N*-Dimethyl-1,2-diphenylhydrazinecarboxamide

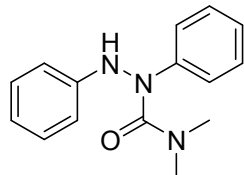

White Solid;  $^1\text{H}$  NMR (400 MHz,  $\text{CDCl}_3$ )  $\delta$  8.45 (s, 1H), 7.29 (t,  $J = 7.9$  Hz, 2H), 7.16 (t,  $J = 8.0$  Hz, 2H), 7.10 – 7.07 (m, 2H), 7.03 (t,  $J = 7.4$  Hz, 1H), 6.81 (d,  $J = 7.6$  Hz, 2H), 6.73 (t,  $J = 7.2$  Hz, 1H), 2.84 (s, 6H).  $^{13}\text{C}$  NMR (100 MHz, DMSO)  $\delta$  164.7, 153.5, 150.2, 134.2, 133.9, 128.4, 125.3, 124.0, 117.1, 42.5. TOF MS  $\text{CI}^+$  (m/z):  $[\text{M}+\text{H}]^+$  calcd for  $\text{C}_{15}\text{H}_{18}\text{N}_3\text{O}$  requires 256.1450, found 256.1448.

### 1,2-Bis(4-fluorophenyl)-*N,N*-dimethylhydrazinecarboxamide

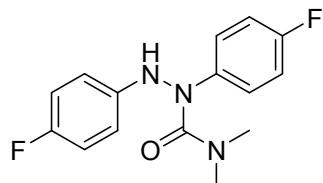

Yellow oil liquid;  $^1\text{H}$  NMR (400 MHz,  $\text{CDCl}_3$ )  $\delta$  7.11(m, 2H), 7.05(d,  $J = 8.0$  Hz, 2H), 7.00 (m, 2H), 6.94 (m, 3H), 2.91 (s, 6H).  $^{13}\text{C}$  NMR (100 MHz,  $\text{CDCl}_3$ )  $\delta$  161.0, 160.5, 159.1, 158.5, 156.8, 144.8 (d,  $J = 2.2$  Hz, 2C), 142.4 (d,  $J = 3.0$  Hz, 2C), 122.8 (d,  $J = 8.2$  Hz, 2C), 116.2, 116.0 (d,  $J = 1.5$  Hz, 2C), 115.7, 115.0 (d,  $J = 7.7$ , 2C), 37.5. TOF MS  $\text{CI}^+$  (m/z):  $[\text{M}+\text{H}]^+$  calcd for  $\text{C}_{15}\text{H}_{16}\text{F}_2\text{N}_3\text{O}$  requires 292.1261, found 292.1264.

### 1,2-bis(4-chlorophenyl)-*N,N*-dimethylhydrazinecarboxamide

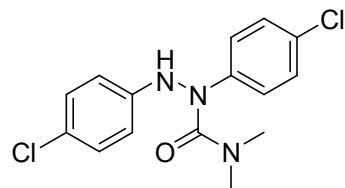

Yellow and oily liquid ;  $^1\text{H}$  NMR (400 MHz,  $\text{CDCl}_3$ )  $\delta$  7.40 (d,  $J = 8.8$  Hz, 2H), 7.32 (d,  $J = 8.8$  Hz, 2H), 7.26(s, 1H), 7.16 (d,  $J = 8.8$  Hz, 2H), 6.99 (d,  $J = 8.8$  Hz, 2H), 3.03 (s, 6H).  $^{13}\text{C}$  NMR (100 MHz,  $\text{CDCl}_3$ )  $\delta$  159.8, 147.0, 144.4, 129.6, 129.3, 129.17, 125.8, 121.7, 114.8, 37.4. TOF MS  $\text{CI}^+$  (m/z):  $[\text{M}+\text{H}]^+$  calcd for  $\text{C}_{15}\text{H}_{16}\text{Cl}_2\text{N}_3\text{O}$  requires 324.0670, found 324.0661.

### 1,2-Bis(4-bromophenyl)-*N,N*-dimethylhydrazinecarboxamide

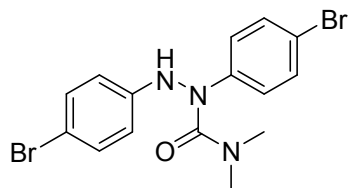

Yellow oil;  $^1\text{H}$  NMR (400 MHz,  $\text{CDCl}_3$ )  $\delta$  7.41 (d,  $J = 8.4$  Hz, 2H), 7.33 (d,  $J = 8.8$  Hz, 1H), 6.97 (s, 2H), 6.94 (s, 1H), 6.80 (d,  $J = 8.4$  Hz, 1H), 2.90 (s, 3H).  $^{13}\text{C}$  NMR (100 MHz,  $\text{CDCl}_3$ )  $\delta$  159.7, 147.5, 144.9, 132.2, 132.1, 122.0, 117.2, 115.2, 113.1, 37.5. MS ESI ( $m/z$ ):  $[\text{M}+\text{H}]^+$  calcd for  $\text{C}_{15}\text{H}_{15}\text{Br}_2\text{N}_3\text{O}$  requires 411.9655, found 411.9662. TOF MS  $\text{CI}^+$  ( $m/z$ ):  $[\text{M}+\text{H}]^+$  calcd for  $\text{C}_{15}\text{H}_{16}\text{Br}_2\text{N}_3\text{O}$  requires 411.9660, found 411.9653.

### ***N,N*-Dimethyl-1,2-bis(4-(trifluoromethoxy)phenyl)hydrazinecarboxamide**

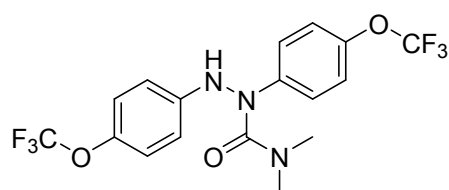

Yellow and oily liquid;  $^1\text{H}$  NMR (400 MHz,  $\text{CDCl}_3$ )  $\delta$  7.18 (d,  $J = 9.2$  Hz, 2H), 7.12-7.10 (m, 5H), 6.92 (m, 2H), 2.92 (s, 6H).  $^{13}\text{C}$  NMR (100 MHz,  $\text{CDCl}_3$ )  $\delta$  159.9, 147.2, 145.6 (d,  $J = 2.0$  Hz, 2C), 144.6, 143.3 (d,  $J = 2.0$  Hz, 2C), 122.5, 122.1, 121.9, 121.7, 121.6, 119.3, 119.2, 114.3, 37.5. TOF MS  $\text{CI}^+$  ( $m/z$ ):  $[\text{M}+\text{H}]^+$  calcd for  $\text{C}_{15}\text{H}_{15}\text{F}_6\text{N}_3\text{O}_3$  requires 424.1096, found 424.1092.

### **2-(4-Bromophenyl)-1-(4-iodophenyl)-*N,N*-dimethylhydrazinecarboxamide**

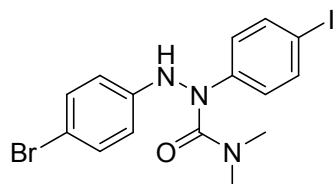

Tan oily liquid;  $^1\text{H}$  NMR (400 MHz,  $\text{CDCl}_3$ )  $\delta$  7.61 (m, 1H), 7.52 (d,  $J = 8.8$  Hz, 1H), 7.42 (m, 1H), 7.34 (d,  $J = 8.8$  Hz, 1H), 6.95 (m, 2H), 6.83 (m, 2H), 6.70 (d,  $J = 8.4$  Hz, 1H), 2.90 (d,  $J = 1.2$  Hz, 6H).  $^{13}\text{C}$  NMR (100 MHz,  $\text{CDCl}_3$ )  $\delta$  159.7, 159.7, 148.3, 147.6, 145.7, 145.0, 138.3, 138.1, 132.2, 132.2, 128.4, 122.3, 122.0, 117.3, 115.8, 115.3, 113.2, 87.8, 82.9, 37.5. TOF MS  $\text{CI}^+$  ( $m/z$ ):  $[\text{M}+\text{H}]^+$  calcd for  $\text{C}_{15}\text{H}_{16}\text{BrIN}_3\text{O}$  requires 459.9540, found 459.9522.

### **1,2-Bis(3-chlorophenyl)-*N,N*-dimethylhydrazinecarboxamide**

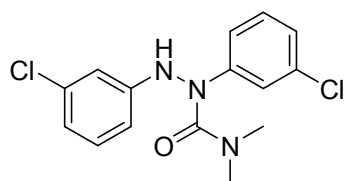

Yellow and oily liquid;  $^1\text{H}$  NMR (400 MHz,  $\text{CDCl}_3$ )  $\delta$  7.26 (m, 1H), 7.18 (d,  $J = 8.0$

Hz, 1H), 7.12 (m, 3H), 6.96 (m, 1H), 6.94 (t,  $J = 2.0$  Hz, 1H), 6.90 (m, 1H), 6.80 (m, 1H), 2.95 (s, 6H).  $^{13}\text{C}$  NMR (100 MHz,  $\text{CDCl}_3$ )  $\delta$  159.5, 149.7, 147.0, 135.2, 135.0, 130.5, 130.2, 124.5, 121.2, 120.5, 118.1, 113.5, 111.9, 37.5. TOF MS  $\text{CI}^+$  (m/z):  $[\text{M}+\text{H}]^+$  calcd for  $\text{C}_{15}\text{H}_{16}\text{Cl}_2\text{N}_3\text{O}$  requires 324.0670, found 324.0681.

### 1,2-Bis(3-bromophenyl)-*N,N*-dimethylhydrazinecarboxamide

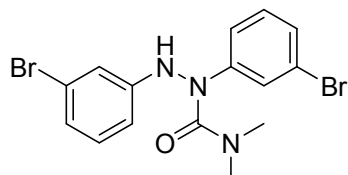

Tan oily liquid;  $^1\text{H}$  NMR (400 MHz,  $\text{CDCl}_3$ )  $\delta$  7.28 (s, 1H), 7.24 (m, 1H), 7.17 (m, 2H), 7.10 (m, 2H), 7.00 (m, 2H), 6.83 (m, 1H), 2.93 (s, 6H).  $^{13}\text{C}$  NMR (100 MHz,  $\text{CDCl}_3$ )  $\delta$  159.5, 149.8, 147.1, 130.8, 130.5, 127.4, 124.1, 123.4, 123.3, 123.0, 118.5, 116.4, 112.3, 37.6. TOF MS  $\text{CI}^+$  (m/z):  $[\text{M}+\text{H}]^+$  calcd for  $\text{C}_{15}\text{H}_{16}\text{Br}_2\text{N}_3\text{O}$  requires 411.9660, found 411.9664.

### Diethyl 4,4'-(1-(dimethylcarbamoyl)hydrazine-1,2-diyl)dibenzoate

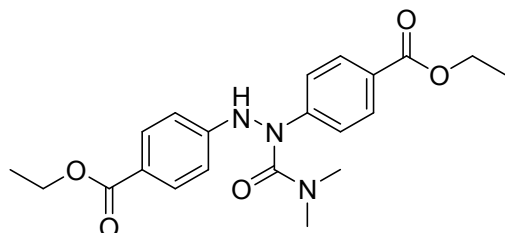

Yellow and oily liquid;  $^1\text{H}$  NMR (400 MHz,  $\text{CDCl}_3$ )  $\delta$  7.97 (d,  $J = 8.4$  Hz, 2H), 7.93 (d,  $J = 8.4$  Hz, 2H), 7.34 (s, 1H), 7.08 (d,  $J = 8.4$  Hz, 2H), 6.88 (d,  $J = 8.4$  Hz, 2H), 4.32 (m, 4H), 2.94 (s, 6H), 1.35 (q,  $J = 7.2$  Hz, 6H).  $^{13}\text{C}$  NMR (100 MHz,  $\text{CDCl}_3$ )  $\delta$  166.4, 166.0, 159.2, 152.1, 149.2, 131.5, 131.0, 126.0, 123.0, 118.8, 112.4, 60.9, 60.5, 37.6, 14.4, 14.4. TOF MS  $\text{CI}^+$  (m/z):  $[\text{M}+\text{H}]^+$  calcd for  $\text{C}_{21}\text{H}_{26}\text{N}_3\text{O}_5$  requires 400.1872, found 400.1870.

### 1-(4-Iodophenyl)-*N,N*-dimethyl-2-phenylhydrazinecarboxamide

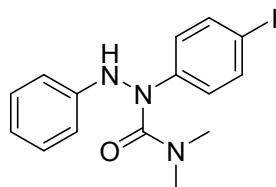

Yellow and oily liquid;  $^1\text{H}$  NMR (400 MHz,  $\text{CDCl}_3$ )  $\delta$  7.56 (m, 2H), 7.32 (t,  $J = 8.0$  Hz, 2H), 7.25 (m, 1H), 7.10 (m, 2H), 6.90 (m, 2H), 6.74 (d,  $J = 8.8$  Hz, 1H), 2.90 (d,  $J = 7.6$  Hz, 6H).  $^{13}\text{C}$  NMR (100 MHz,  $\text{CDCl}_3$ )  $\delta$  160.2, 159.8, 148.7, 148.4, 145.9, 138.0, 129.4, 124.7, 122.2, 121.3, 120.8, 115.9, 113.6, 82.7, 37.5, 37.5. TOF MS  $\text{CI}^+$  (m/z):  $[\text{M}+\text{H}]^+$  calcd for  $\text{C}_{15}\text{H}_{17}\text{IN}_3\text{O}$  requires 382.0416, found 382.0408.

### 1-(4-Bromophenyl)-*N,N*-dimethyl-2-phenylhydrazinecarboxamide

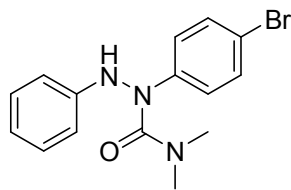

Tan oily liquid;  $^1\text{H}$  NMR (400 MHz,  $\text{CDCl}_3$ )  $\delta$  7.44 (m, 1H), 7.35 (m, 2H), 7.28 (m, 1H), 7.13 (m, 2H), 7.02 (m, 1H), 6.95 (m, 2H), 6.88 (m, 1H), 2.93 (d,  $J = 6.4$  Hz, 6H).  $^{13}\text{C}$  NMR (100 MHz,  $\text{CDCl}_3$ )  $\delta$  160.2, 159.9, 148.4, 148.0, 146.0, 145.3, 132.2, 132.1, 129.4, 124.7, 121.9, 121.3, 120.8, 116.9, 115.4, 113.6, 112.9, 37.6, 37.5. TOF MS  $\text{CI}^+$  (m/z):  $[\text{M}+\text{H}]^+$  calcd for  $\text{C}_{15}\text{H}_{17}\text{BrN}_3\text{O}$  requires 334.0555, found 334.0555.

### 1-(4-Chlorophenyl)-N,N-dimethyl-2-phenylhydrazinecarboxamide

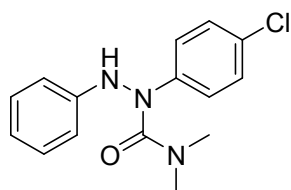

Yellow and oily liquid;  $^1\text{H}$  NMR (400 MHz,  $\text{CDCl}_3$ )  $\delta$  7.35 (m, 1H), 7.29 (m, 2H), 7.22 (d,  $J = 8.8$  Hz, 1H), 7.12 (m, 4H), 6.93 (m, 2H), 2.93 (d,  $J = 4.8$  Hz, 6H).  $^{13}\text{C}$  NMR (100 MHz,  $\text{CDCl}_3$ )  $\delta$  160.4, 160.1, 148.4, 147.5, 146.0, 144.8, 133.1, 130.1, 129.3, 129.2, 128.4, 125.6, 124.7, 121.7, 121.2, 120.8, 114.9, 113.5, 37.6, 37.5. TOF MS  $\text{CI}^+$  (m/z):  $[\text{M}+\text{H}]^+$  calcd for  $\text{C}_{15}\text{H}_{17}\text{ClN}_3\text{O}$  requires 290.1060, found 290.1062.

### N-Methyl-1,2-diphenylhydrazinecarboxamide

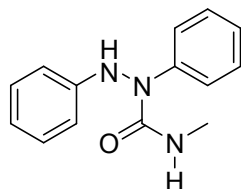

Yellow and oily liquid;  $^1\text{H}$  NMR (400 MHz,  $\text{CDCl}_3$ )  $\delta$  7.47 (d,  $J = 8.0$  Hz, 2H), 7.23 (dd,  $J = 16.0, 8.0$  Hz, 4H), 7.06 (t,  $J = 7.2$  Hz, 1H), 6.89 (t,  $J = 7.2$  Hz, 1H), 6.83 (d,  $J = 8.0$  Hz, 2H), 6.53 (d,  $J = 7.2$  Hz, 1H), 6.26 (s, 1H), 2.83 (d,  $J = 4.8$  Hz, 3H).  $^{13}\text{C}$  NMR (100 MHz,  $\text{CDCl}_3$ )  $\delta$  157.7, 145.7, 141.5, 129.4, 128.6, 124.6, 122.2, 121.3, 113.4, 26.9. TOF MS  $\text{CI}^+$  (m/z):  $[\text{M}+\text{H}]^+$  calcd for  $\text{C}_{14}\text{H}_{16}\text{N}_3\text{O}$  requires 242.1293, found 242.1288.

### 1,2-Diphenylhydrazinecarboxamide

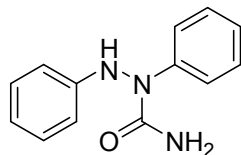

Yellow and oily liquid;  $^1\text{H}$  NMR (400 MHz, DMSO)  $\delta$  8.73 (s, 1H), 7.52 (d,  $J = 8.0$  Hz, 2H), 7.23 (t,  $J = 8.0$  Hz, 2H), 7.14 (t,  $J = 8.0$  Hz, 2H), 6.99 (t,  $J = 7.2$  Hz, 1H),



6.72 (d,  $J = 7.6$  Hz, 3H), 6.59 (s, 2H).  $^{13}\text{C}$  NMR (100 MHz, DMSO)  $\delta$  163.0, 151.8, 147.1, 134.1, 133.1, 128.6, 127.4, 124.4, 117.7. TOF MS  $\text{CI}^+$  ( $m/z$ ):  $[\text{M}+\text{H}]^+$  calcd for  $\text{C}_{13}\text{H}_{14}\text{N}_3\text{O}$  requires 228.1137, found 228.1145.

#### ***N,N*-Diethyl-1,2-diphenylhydrazinecarboxamide**

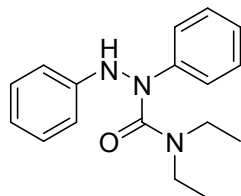

Yellow and oily liquid;  $^1\text{H}$  NMR (400 MHz,  $\text{CDCl}_3$ )  $\delta$  7.32 (t,  $J = 7.6$  Hz, 2H), 7.25 (t,  $J = 8.0$  Hz, 2H), 7.17 (d,  $J = 7.6$  Hz, 2H), 7.12 (t,  $J = 7.2$  Hz, 1H), 6.99 (d,  $J = 8.0$  Hz, 1H), 6.95 (s, 1H), 6.90 (t,  $J = 7.2$  Hz, 1H), 3.34 (d,  $J = 6.8$  Hz, 4H), 1.07 (t,  $J = 7.2$  Hz, 6H).  $^{13}\text{C}$  NMR (100 MHz,  $\text{CDCl}_3$ )  $\delta$  160.2, 148.9, 147.0, 129.3, 129.2, 124.6, 121.1, 121.0, 113.9, 41.6, 13.0. TOF MS  $\text{CI}^+$  ( $m/z$ ):  $[\text{M}+\text{H}]^+$  calcd for  $\text{C}_{17}\text{H}_{22}\text{N}_3\text{O}$  requires 284.1763, found 284.1759.

#### ***N,N*-Dimethyl-2-phenyl-2-(phenylamino)acetamide**

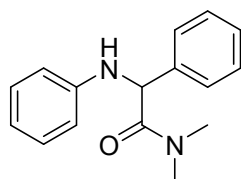

Yellow and oily liquid;  $^1\text{H}$  NMR (400 MHz,  $\text{CDCl}_3$ )  $\delta$  7.45 (d,  $J = 7.2$  Hz, 2H), 7.33 (t,  $J = 7.4$  Hz, 2H), 7.28 (s, 1H), 7.26 (m, 2H), 7.11 (t,  $J = 8.0$  Hz, 2H), 6.66 (m, 3H), 5.27 (s, 1H), 3.03 (s, 3H), 2.97 (s, 3H).  $^{13}\text{C}$  NMR (100 MHz,  $\text{CDCl}_3$ )  $\delta$  170.9, 146.2, 138.1, 129.2, 128.9, 128.1, 127.9, 117.9, 113.7, 58.2, 37.0, 36.3. TOF MS  $\text{CI}^+$  ( $m/z$ ):  $[\text{M}+\text{H}]^+$  calcd for  $\text{C}_{16}\text{H}_{19}\text{N}_2\text{O}$  requires 255.1497, found 255.1496.

#### ***N,N'*-Diphenylmorpholine-4-carbohydrazide**

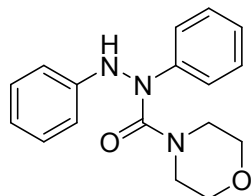

Yellow and oily liquid;  $^1\text{H}$  NMR (400 MHz,  $\text{CDCl}_3$ )  $\delta$  = 7.34 (t,  $J = 7.9$  Hz, 2H), 7.27 (t,  $J = 8.0$  Hz, 2H), 7.19 (d,  $J = 7.8$  Hz, 2H), 7.14 (t,  $J = 7.3$ , 1H), 6.94 (t,  $J = 7.6$  Hz, 3H), 3.60 (m, 4H), 3.60 (m, 4H).  $^{13}\text{C}$  NMR (100 MHz,  $\text{CDCl}_3$ )  $\delta$  159.3, 148.7, 145.9, 129.4, 129.4, 124.8, 121.2, 120.9, 113.4, 66.4, 45.8. TOF MS  $\text{CI}^+$  ( $m/z$ ):  $[\text{M}+\text{H}]^+$  calcd for  $\text{C}_{17}\text{H}_{20}\text{N}_3\text{O}_2$  requires 298.1555, found 298.1556.

#### ***N,N'*-Diphenylformohydrazide**

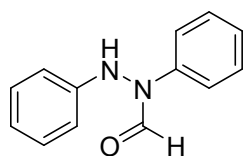

White Solid;  $^1\text{H}$  NMR (400 MHz, DMSO)  $\delta$  9.19 (s, 1H), 8.98 (s, 1H), 8.79 (s, 1H), 8.54 (s, 1H), 7.68 (d,  $J = 8.0$  Hz, 2H), 7.51 (d,  $J = 7.6$  Hz, 2H), 7.38 (m, 4H), 7.18 (m, 6H), 6.75 (m, 6H).  $^{13}\text{C}$  NMR (100 MHz, DMSO)  $\delta$  170.2, 165.9, 152.4, 152.2, 146.9, 144.6, 134.5, 134.4, 134.1, 133.9, 130.5, 126.2, 125.1, 124.5, 124.2, 117.5, 117.4, 114.5. TOF MS  $\text{CI}^+$  ( $m/z$ ):  $[\text{M}+\text{H}]^+$  calcd for  $\text{C}_{13}\text{H}_{13}\text{N}_2\text{O}$  requires 213.1034, found 213.1028.

#### ***N,N'*-Bis(4-fluorophenyl)formohydrazide**

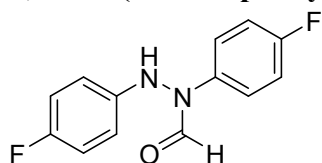

Yellow and oily liquid;  $^1\text{H}$  NMR (400 MHz, DMSO)  $\delta$  9.13 (s, 1H), 8.87 (s, 1H), 8.77 (s, 1H), 8.50 (s, 1H), 7.65 (dd,  $J = 8.8, 4.8$  Hz, 2H), 7.53 (dd,  $J = 8.8, 4.8$  Hz, 2H), 7.24 (m, 4H), 7.01 (q,  $J = 9.1$  Hz, 4H), 6.74 (m, 4H).  $^{13}\text{C}$  NMR (100 MHz,  $\text{CDCl}_3$ )  $\delta$  164.96, 162.18, 161.53, 160.25, 159.73, 159.65, 157.26, 142.39, 142.37, 141.95, 136.86, 122.85, 122.77, 121.43, 121.35, 116.79, 116.47, 116.24, 116.06, 115.96, 115.88, 115.83, 114.41, 114.34. TOF MS  $\text{CI}^+$  ( $m/z$ ):  $[\text{M}+\text{H}]^+$  calcd for  $\text{C}_{13}\text{H}_{11}\text{F}_2\text{N}_2\text{O}$  requires 249.0839, found 249.0842.

#### ***N,N'*-Bis(4-chlorophenyl)formohydrazide**

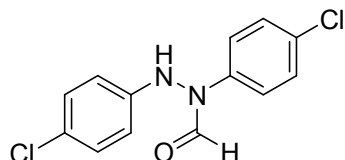

Yellow and oily liquid;  $^1\text{H}$  NMR (400 MHz,  $\text{CDCl}_3$ )  $\delta$  8.82 (s, 1H), 8.60 (d,  $J = 24.2$  Hz, 1H), 7.60 (d,  $J = 8.8$  Hz, 1H), 7.39 (q,  $J = 9.0$  Hz, 6H), 7.30 (m, 1H), 7.20 (dd,  $J = 12.0, 8.8$  Hz, 4H), 6.96 (s, 1H), 6.80 (s, 1H), 6.73 (dd,  $J = 9.2, 2.5$  Hz, 4H).  $^{13}\text{C}$  NMR (100 MHz,  $\text{CDCl}_3$ )  $\delta$  164.9, 160.0, 144.9, 144.4, 139.3, 137.9, 131.9, 131.2, 129.9, 129.7, 129.3, 129.2, 127.0, 121.7, 120.3, 115.4, 114.0. TOF MS  $\text{CI}^+$  ( $m/z$ ):  $[\text{M}+\text{H}]^+$  calcd for  $\text{C}_{13}\text{H}_{11}\text{Cl}_2\text{N}_2\text{O}$  requires 281.0248, found 281.0239.

#### ***N,N'*-Bis(4-bromophenyl)formohydrazide**

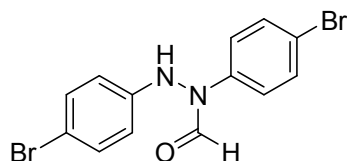

Yellow and oily liquid;  $^1\text{H}$  NMR (400 MHz, DMSO)  $\delta$  9.35 (s, 1H), 8.98 (d,  $J = 8.4$  Hz, 2H), 8.51 (s, 1H), 7.66 (d,  $J = 8.4$  Hz, 2H), 7.47 (m, 6H), 7.20 (m, 4H), 6.74 (dd,  $J = 15.2, 8.7$  Hz, 4H).  $^{13}\text{C}$  NMR (101 MHz, DMSO)  $\delta$  165.47, 161.17, 146.52, 146.13, 140.97, 138.61, 129.90, 129.78, 129.62, 129.26, 129.23, 124.12, 123.41, 122.97, 121.79, 120.99, 114.53, 114.35. TOF MS  $\text{CI}^+$  ( $m/z$ ):  $[\text{M}+\text{H}]^+$  calcd for  $\text{C}_{13}\text{H}_{11}\text{Br}_2\text{N}_2\text{O}$  requires 368.9238, found 368.9231.

### ***N,N'*-Bis(4-(trifluoromethoxy)phenyl)formohydrazide**

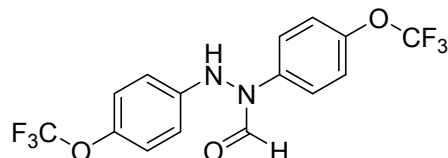

Yellow and oily liquid;  $^1\text{H}$  NMR (400 MHz, DMSO)  $\delta$  9.46 (s, 1H), 9.08 (s, 1H), 9.00 (s, 1H), 8.53 (s, 1H), 7.77 (d,  $J = 8.8$  Hz, 2H), 7.61 (d,  $J = 8.8$  Hz, 3H), 7.42 (t,  $J = 7.6$  Hz, 5H), 7.18 (dd,  $J = 12.4, 8.8$  Hz, 4H), 6.81 (dd,  $J = 15.3, 8.8$  Hz, 4H).  $^{13}\text{C}$  NMR (100 MHz,  $\text{CDCl}_3$ )  $\delta$  164.9, 160.2, 158.9, 147.2, 146.5, 144.9, 144.5, 143.9, 143.6, 139.3, 137.9, 136.8, 124.1, 122.9, 122.6, 122.4, 121.7, 121.6, 120.4, 119.2, 119.1, 114.9, 113.4. TOF MS  $\text{CI}^+$  ( $m/z$ ):  $[\text{M}+\text{H}]^+$  calcd for  $\text{C}_{15}\text{H}_{11}\text{F}_6\text{N}_2\text{O}_3$  requires 381.0674, found 381.0670.

### ***N,N'*-Dip-tolylformohydrazide**

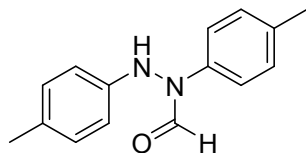

Yellow and oily liquid;  $^1\text{H}$  NMR (400 MHz,  $\text{CDCl}_3$ )  $\delta$  8.79 (s, 2H), 8.59 (s, 1H), 7.49 (d,  $J = 8.4$  Hz, 1H), 7.31 (d,  $J = 8.4$  Hz, 3H), 7.21 (d,  $J = 8.4$  Hz, 3H), 7.12 (d,  $J = 8.4$  Hz, 1H), 7.03 (t,  $J = 8.4$  Hz, 4H), 6.73 (t,  $J = 8.0$  Hz, 5H), 2.33 (d, 6H), 2.25 (s, 6H).  $^{13}\text{C}$  NMR (100 MHz,  $\text{CDCl}_3$ )  $\delta$  165.2, 160.3, 144.2, 143.9, 138.6, 137.0, 136.1, 135.7, 131.3, 131.0, 130.2, 130.1, 129.8, 129.6, 120.9, 119.5, 114.4, 113.2, 20.9, 20.9, 20.6, 20.5. TOF MS  $\text{CI}^+$  ( $m/z$ ):  $[\text{M}+\text{H}]^+$  calcd for  $\text{C}_{15}\text{H}_{17}\text{N}_2\text{O}$  requires 241.1341, found 241.1341.

### **References**

1. C. Zhang, N. Jiao, *Angew. Chem. Int. Ed.* **2010**, *49*, 6174–6177;
2. H. Ma, W. Li, J. Wang, Y. Gong, Z. Lei, *Tetrahedron*, **2012**, *68*, 8358-8366;
3. B. Priewisch, R.-U. K. Braun, *J. Org. Chem.* **2005**, *70*, 2350-2352

## X-ray crystallographic data for compound 4a (CCDC 1040947):

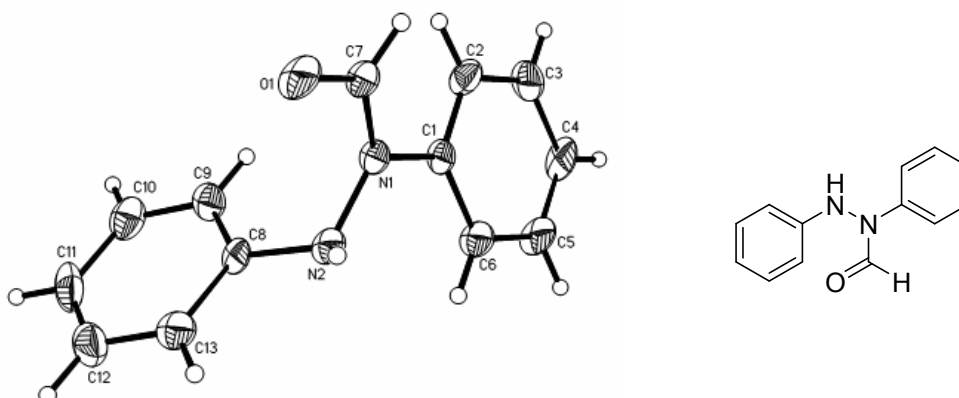

### Summary of Crystallographic Data for C<sub>13</sub>H<sub>12</sub>N<sub>2</sub>O:

|                      |                                                  |
|----------------------|--------------------------------------------------|
| Chemical formula     | C <sub>13</sub> H <sub>12</sub> N <sub>2</sub> O |
| Formula weight       | 212.25                                           |
| Crystal Color        | Colorless                                        |
| Crystal System       | Orthorhombic                                     |
| Space Group          | P 21 21 21                                       |
| Cell Volume          | 1083.22(12)                                      |
| Crystal Size         | 0.50×0.40×0.20                                   |
| Cell formula units Z | 4                                                |
| Cell length a        | 6.3920(4)                                        |
| Cell length b        | 8.4041(5)                                        |
| Cell length c        | 20.1646(12)                                      |
| Cell angle alpha     | 90.00                                            |
| Cell angle beta      | 90.00                                            |
| Cell angle gamma     | 90.00                                            |
| Temp, K/ λ, Å        | 293(2)                                           |
| Crystal_F_000        | 448                                              |
| R factor all         | 0.1075                                           |
| Radiation type       | MoK $\alpha$                                     |

### Selected Bond Distances:

| Bond  | Length (Å) | Bond   | Length (Å) |
|-------|------------|--------|------------|
| O1 C7 | 1.235(5)   | C5 H5  | 0.9300     |
| N1 C7 | 1.343(5)   | C6 H6  | 0.9300     |
| N1 N2 | 1.407(4)   | C7 H7  | 0.9300     |
| N1 C1 | 1.435(5)   | C8 C13 | 1.382(5)   |
| N2 C8 | 1.420(5)   | C8 C9  | 1.382(6)   |

|        |          |         |          |
|--------|----------|---------|----------|
| N2 H2A | 0.83(5)  | C9 C10  | 1.380(5) |
| C1 C2  | 1.374(6) | C9 H9   | 0.9300   |
| C1 C6  | 1.396(5) | C10 C11 | 1.381(7) |
| C2 C3  | 1.398(6) | C10 H10 | 0.9300   |
| C2 H2  | 0.9300   | C11 C12 | 1.366(7) |
| C3 C4  | 1.379(7) | C11 H11 | 0.9300   |
| C3 H3  | 0.9300   | C12 C13 | 1.385(6) |
| C4 C5  | 1.370(7) | C12 H12 | 0.9300   |
| C4 H4  | 0.9300   | C13 H13 | 0.9300   |
| C5 C6  | 1.390(6) |         |          |

**Selected Bond angles:**

| Bond      | Angle (deg) | Bond        | Angle (deg) |
|-----------|-------------|-------------|-------------|
| C7 N1 N2  | 119.1(3)    | C1 C6 H6    | 120.3       |
| C7 N1 C1  | 122.6(3)    | O1 C7 N1    | 122.5(4)    |
| N2 N1 C1  | 117.5(3)    | O1 C7 H7    | 118.8       |
| N1 N2 C8  | 115.8(3)    | N1 C7 H7    | 118.8       |
| N1 N2 H2A | 103(3)      | C13 C8 C9   | 119.6(3)    |
| C8 N2 H2A | 120(4)      | C13 C8 N2   | 117.2(3)    |
| C2 C1 C6  | 120.0(4)    | C9 C8 N2    | 123.2(3)    |
| C2 C1 N1  | 121.0(4)    | C10 C9 C8   | 119.6(4)    |
| C6 C1 N1  | 119.0(3)    | C10 C9 H9   | 120.2       |
| C1 C2 C3  | 119.9(4)    | C8 C9 H9    | 120.2       |
| C1 C2 H2  | 120.0       | C9 C10 C11  | 120.7(4)    |
| C3 C2 H2  | 120.0       | C9 C10 H10  | 119.7       |
| C4 C3 C2  | 119.8(5)    | C11 C10 H10 | 119.7       |
| C4 C3 H3  | 120.1       | C12 C11 C10 | 119.9(4)    |
| C2 C3 H3  | 120.1       | C12 C11 H11 | 120.1       |
| C5 C4 C3  | 120.3(4)    | C10 C11 H11 | 120.1       |
| C5 C4 H4  | 119.8       | C11 C12 C13 | 119.9(4)    |
| C3 C4 H4  | 119.8       | C11 C12 H12 | 120.0       |
| C4 C5 C6  | 120.4(4)    | C13 C12 H12 | 120.0       |
| C4 C5 H5  | 119.8       | C8 C13 C12  | 120.4(4)    |
| C6 C4 H4  | 119.8       | C8 C13 H13  | 119.8       |
| C5 C6 C1  | 119.4(4)    | C12 C13 H13 | 119.8       |
| C5 C6 H6  | 120.3       |             |             |

# Copy of <sup>1</sup>H and <sup>13</sup>C NMR Spectra for Corresponding Products:

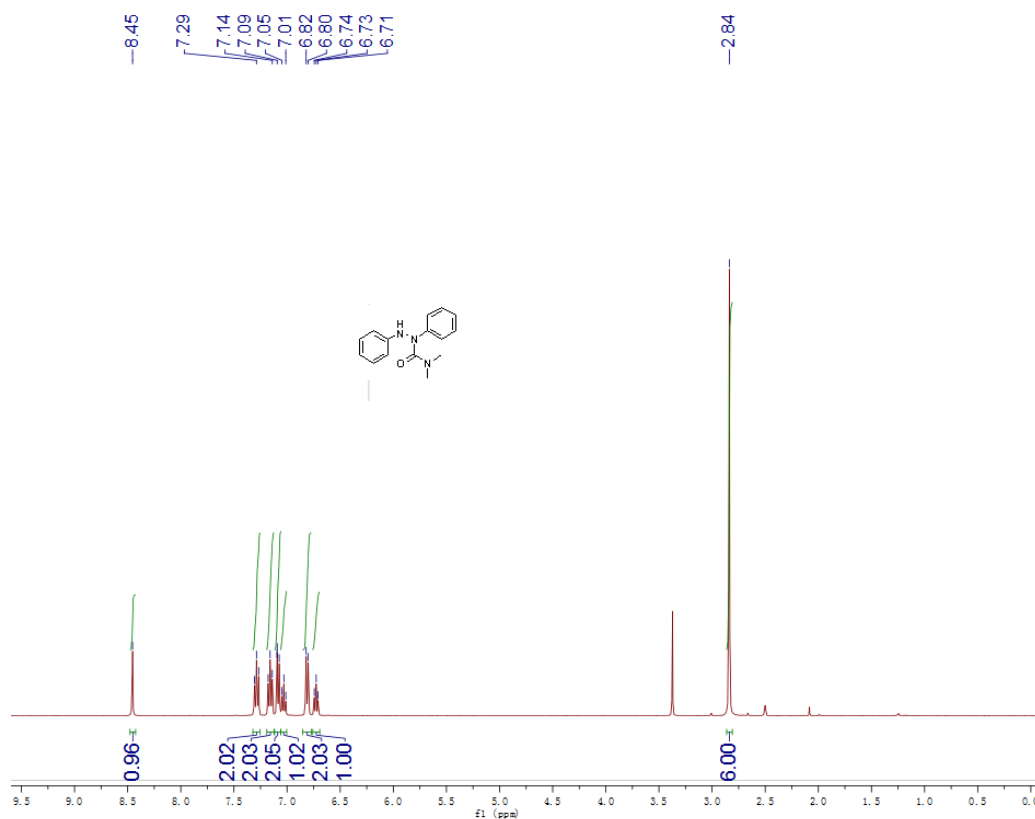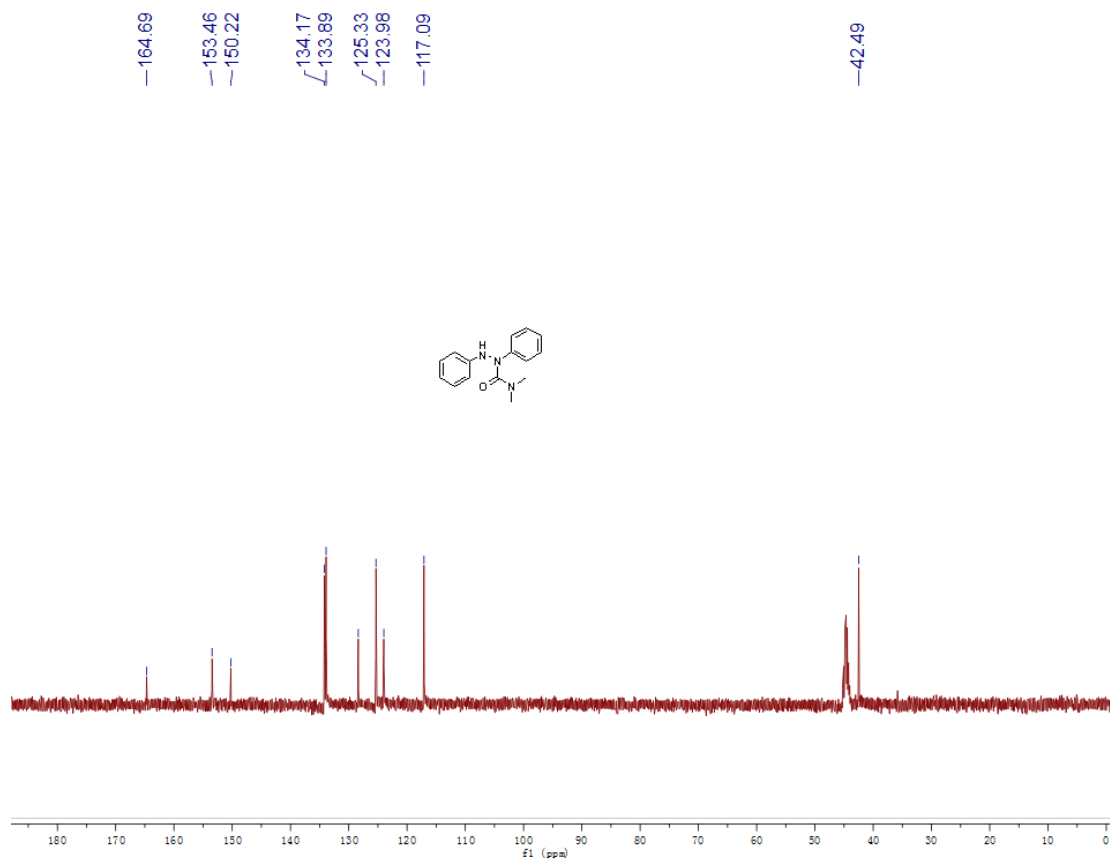

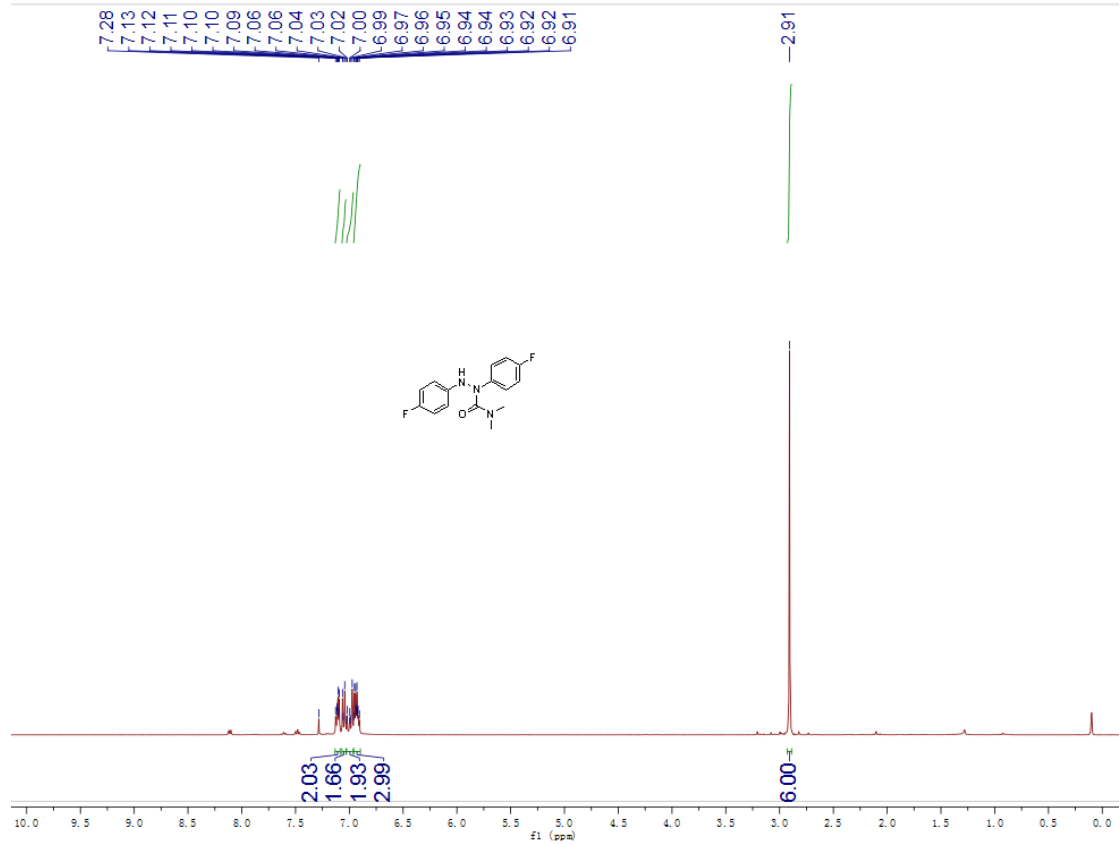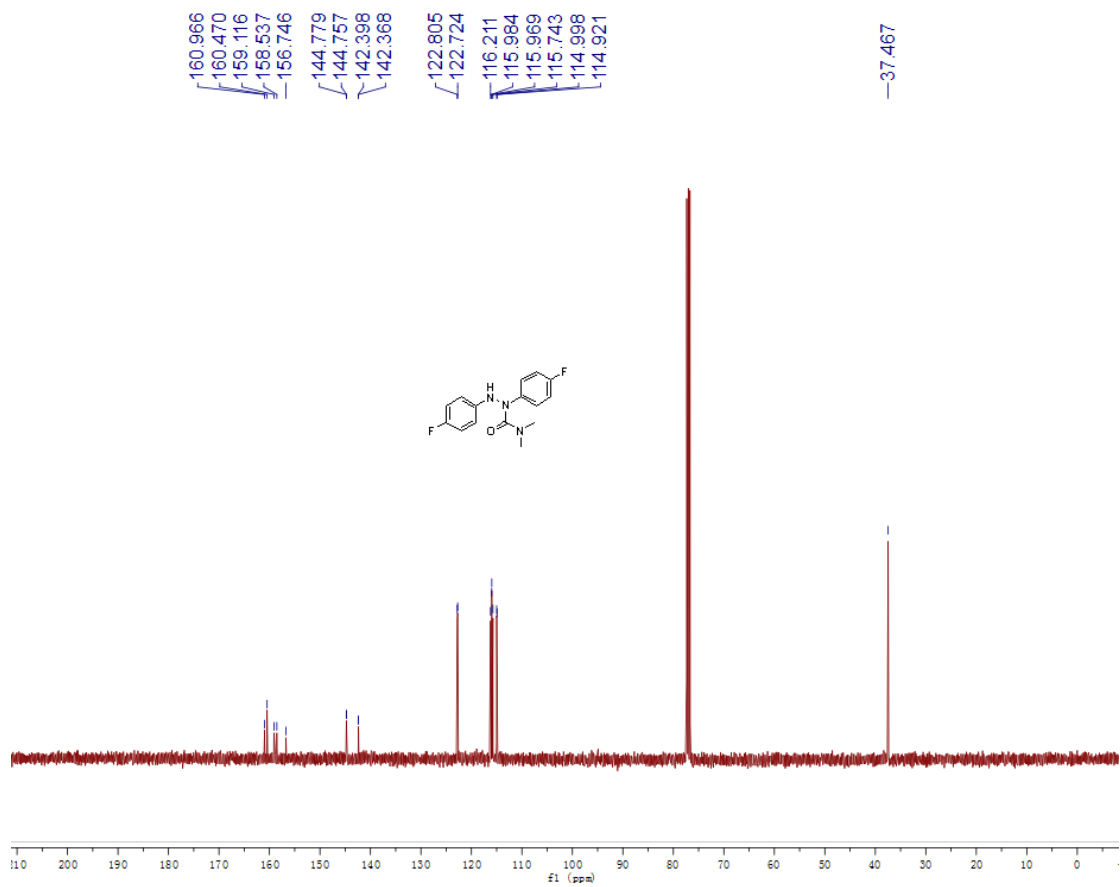

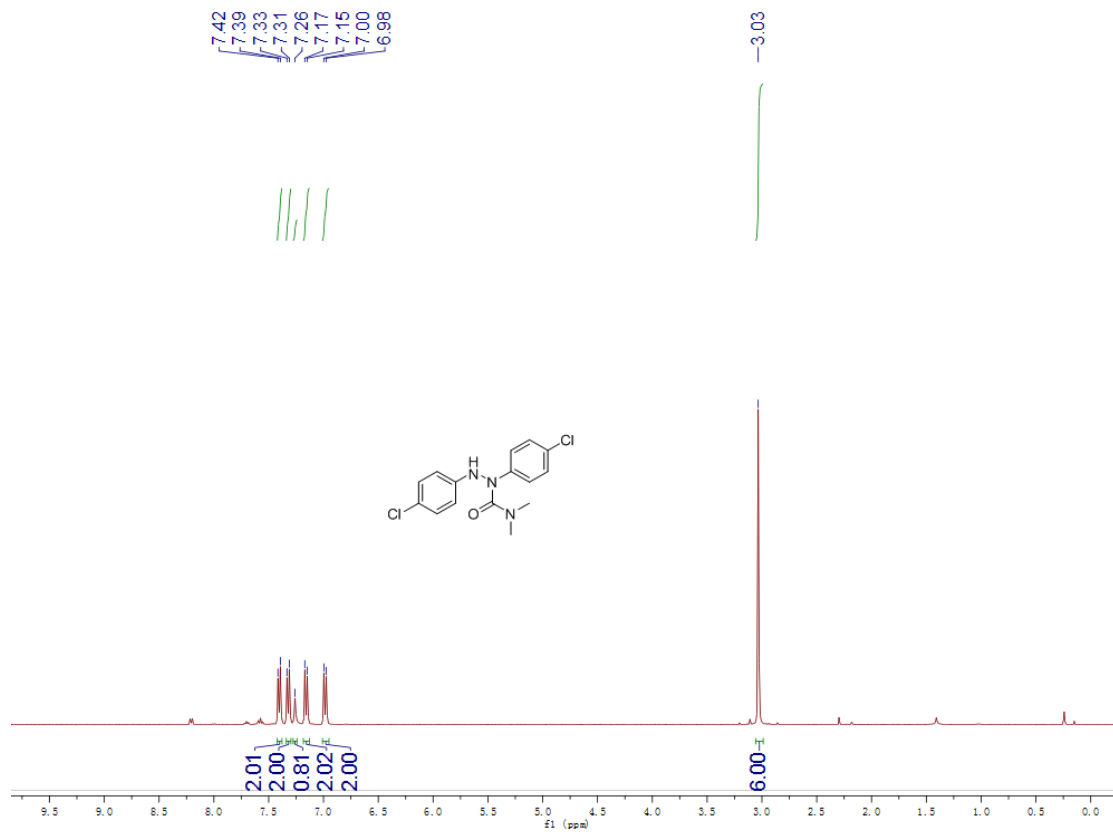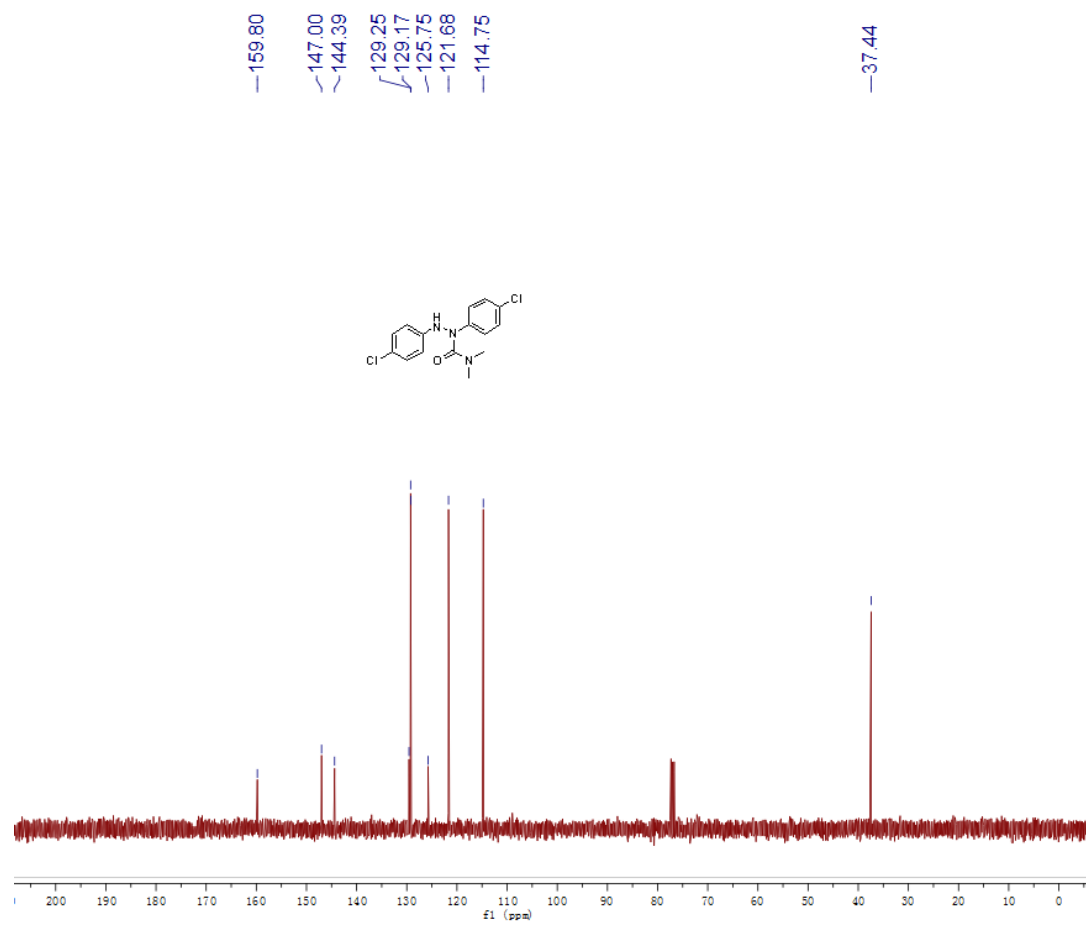



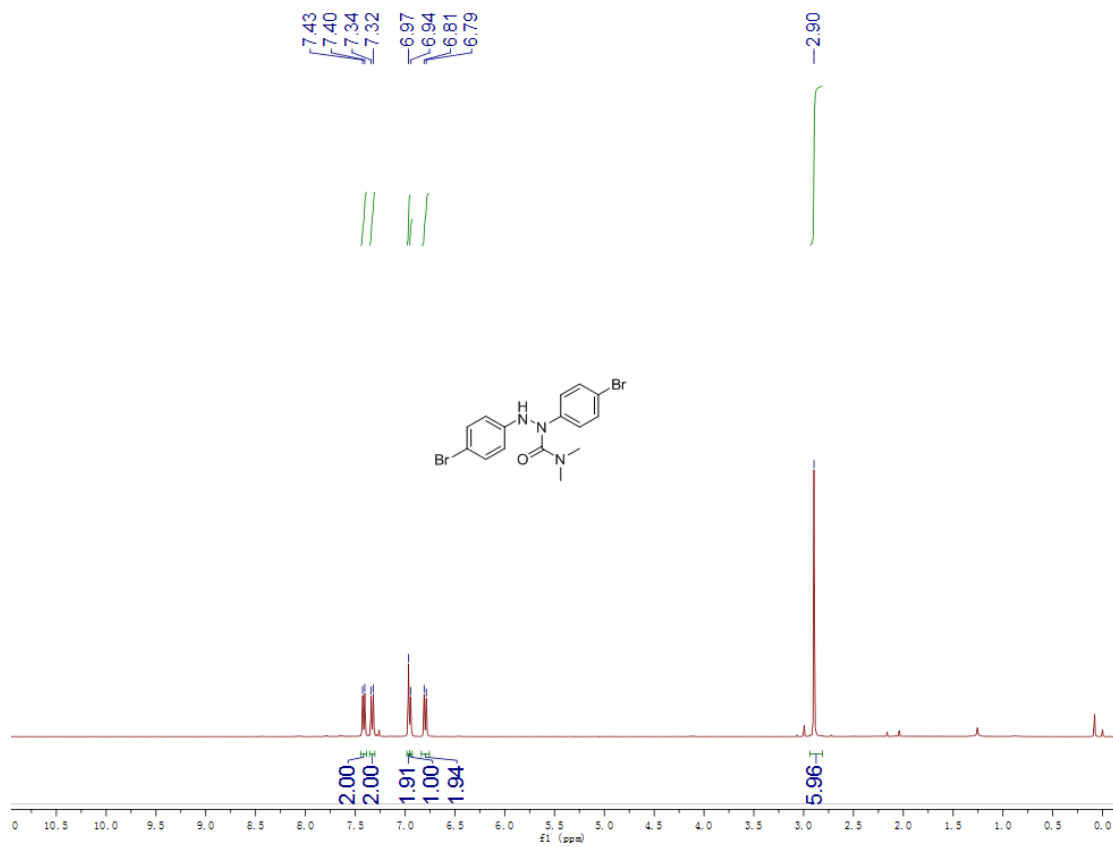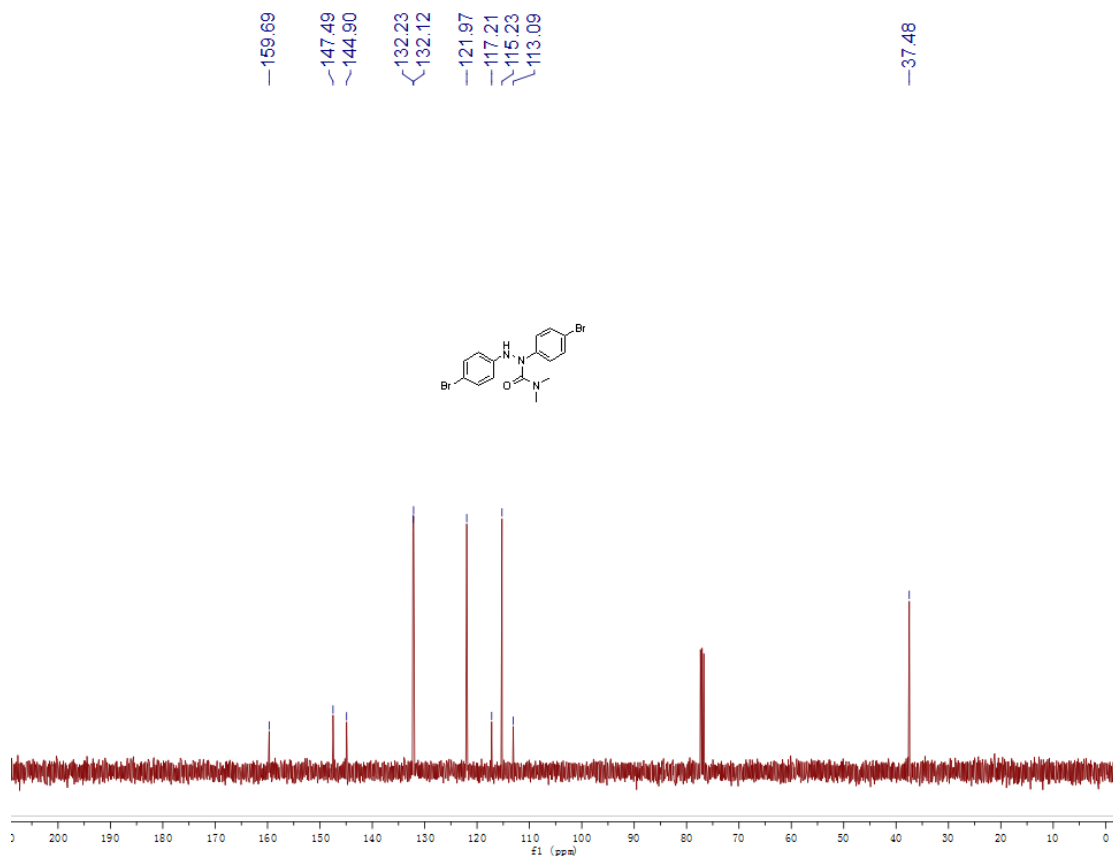

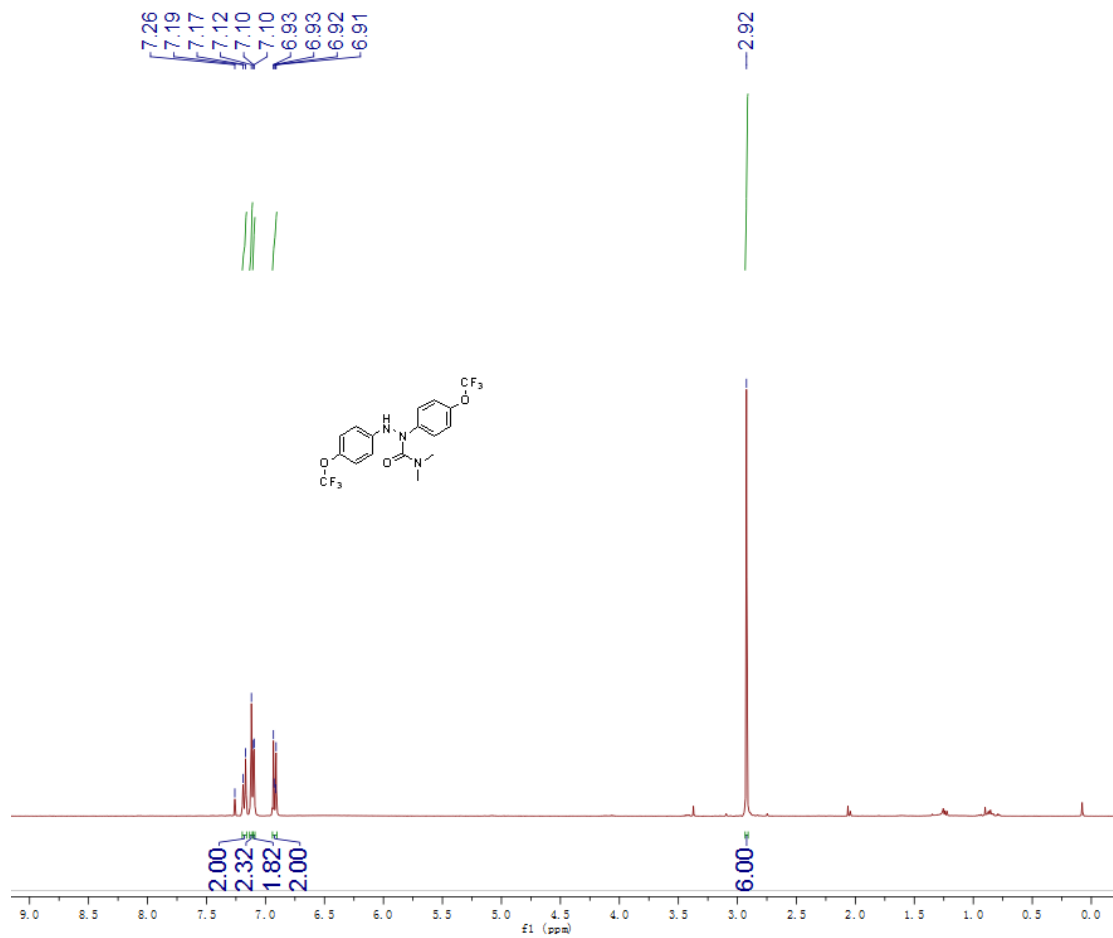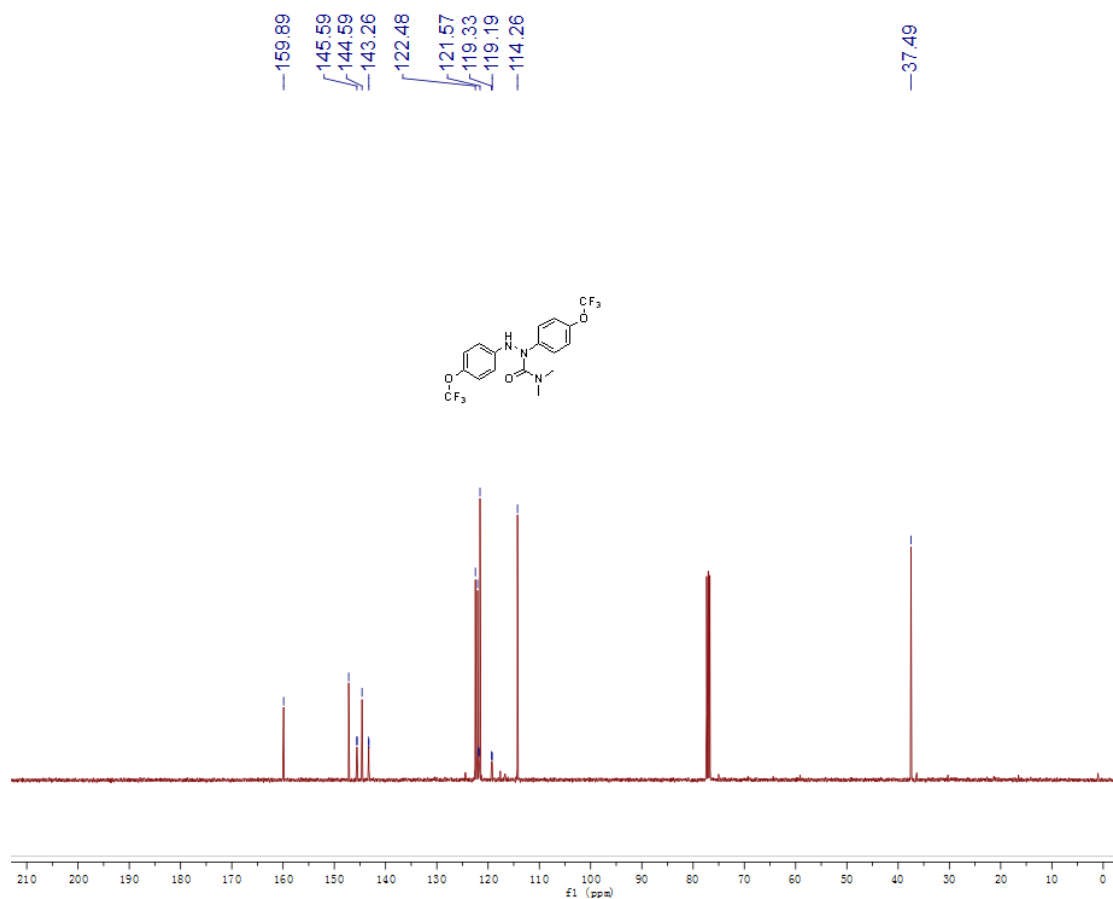

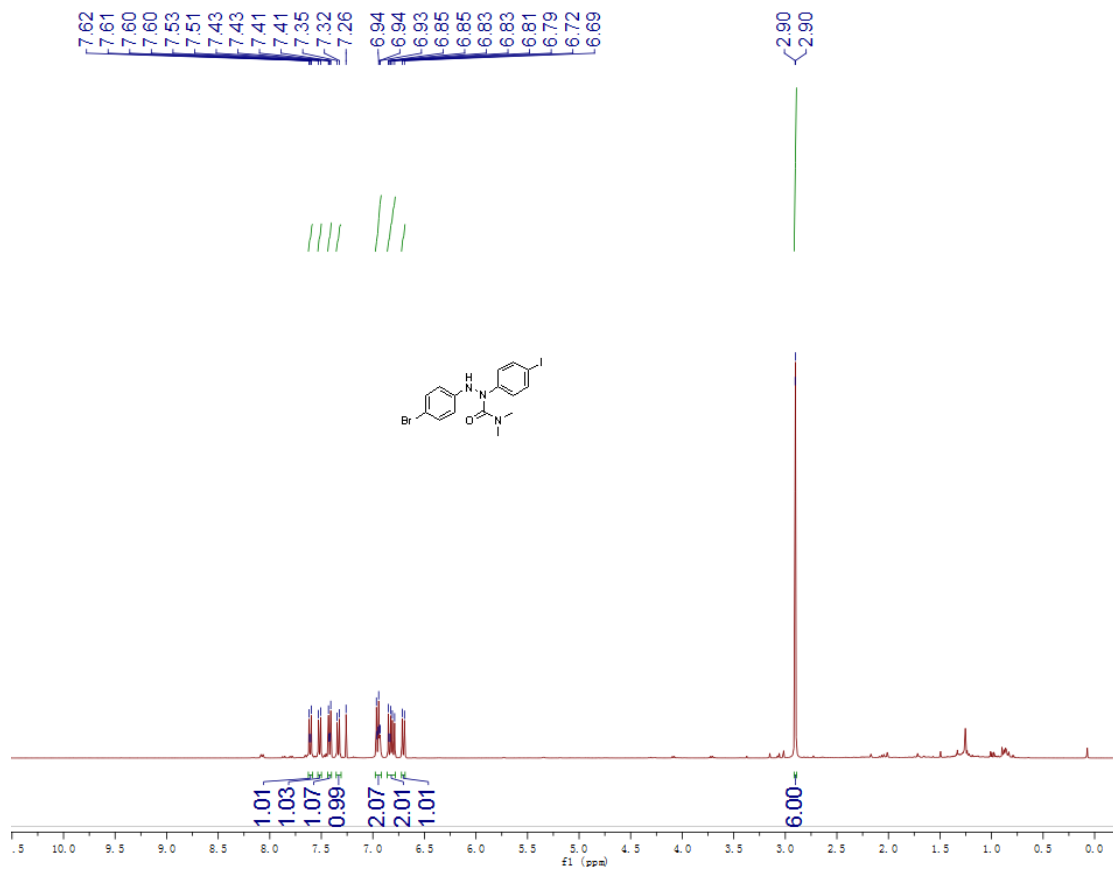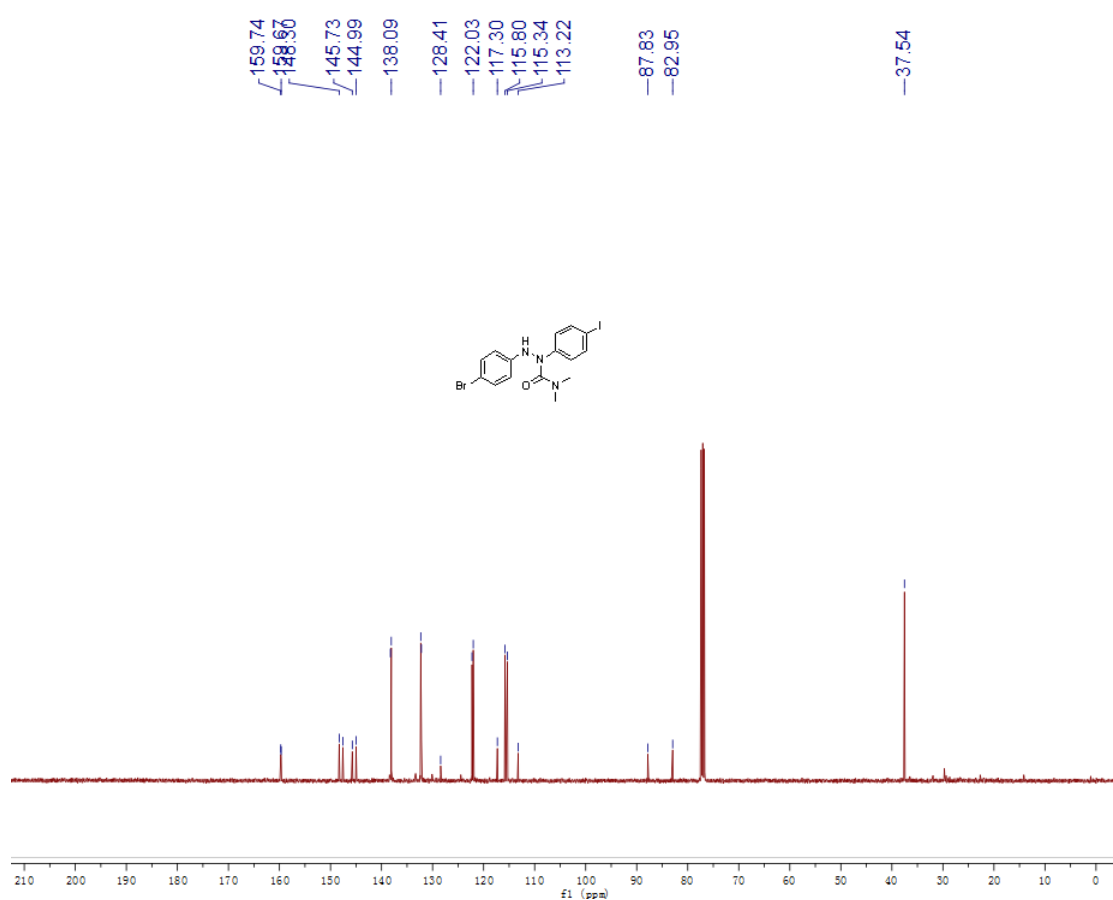

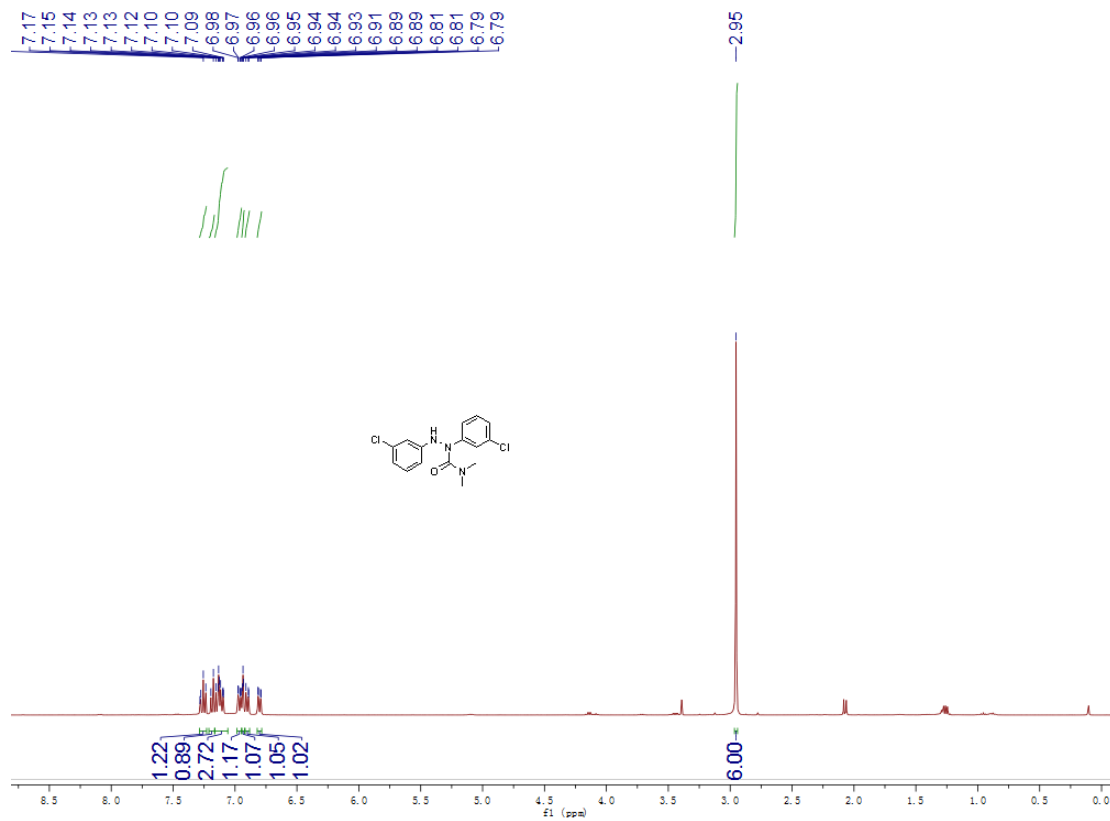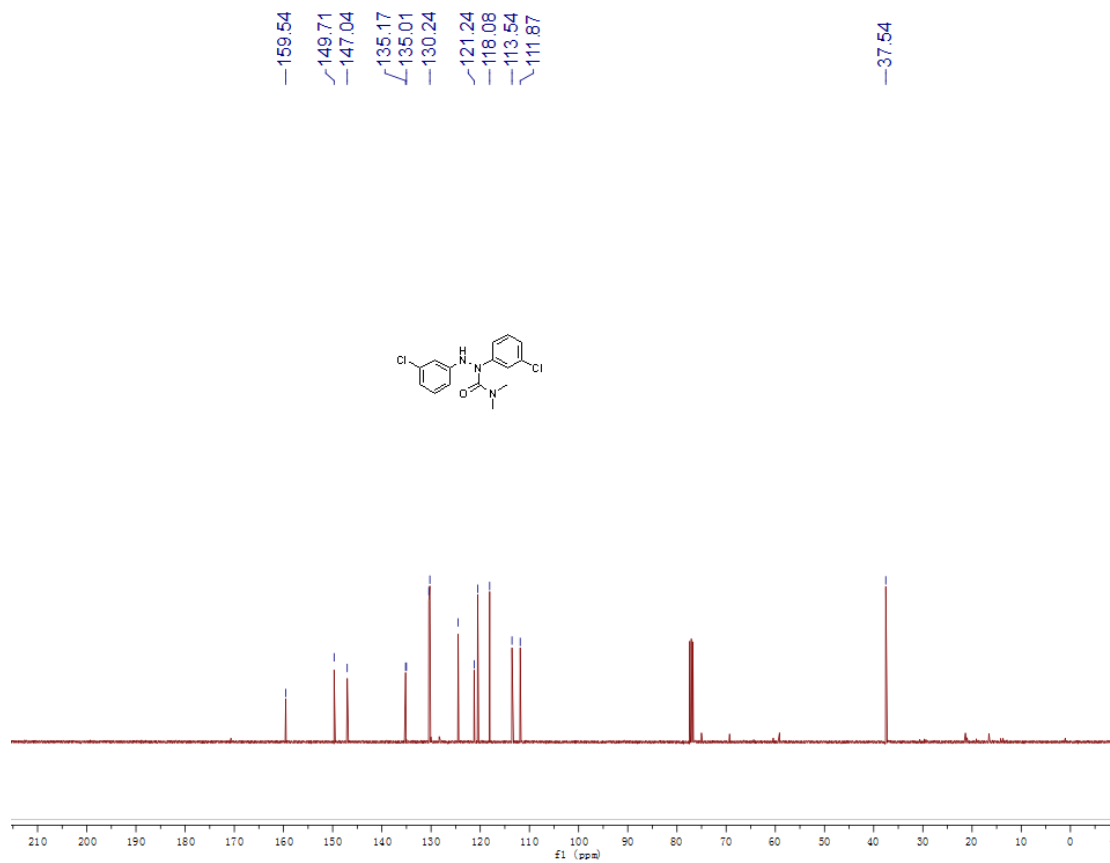

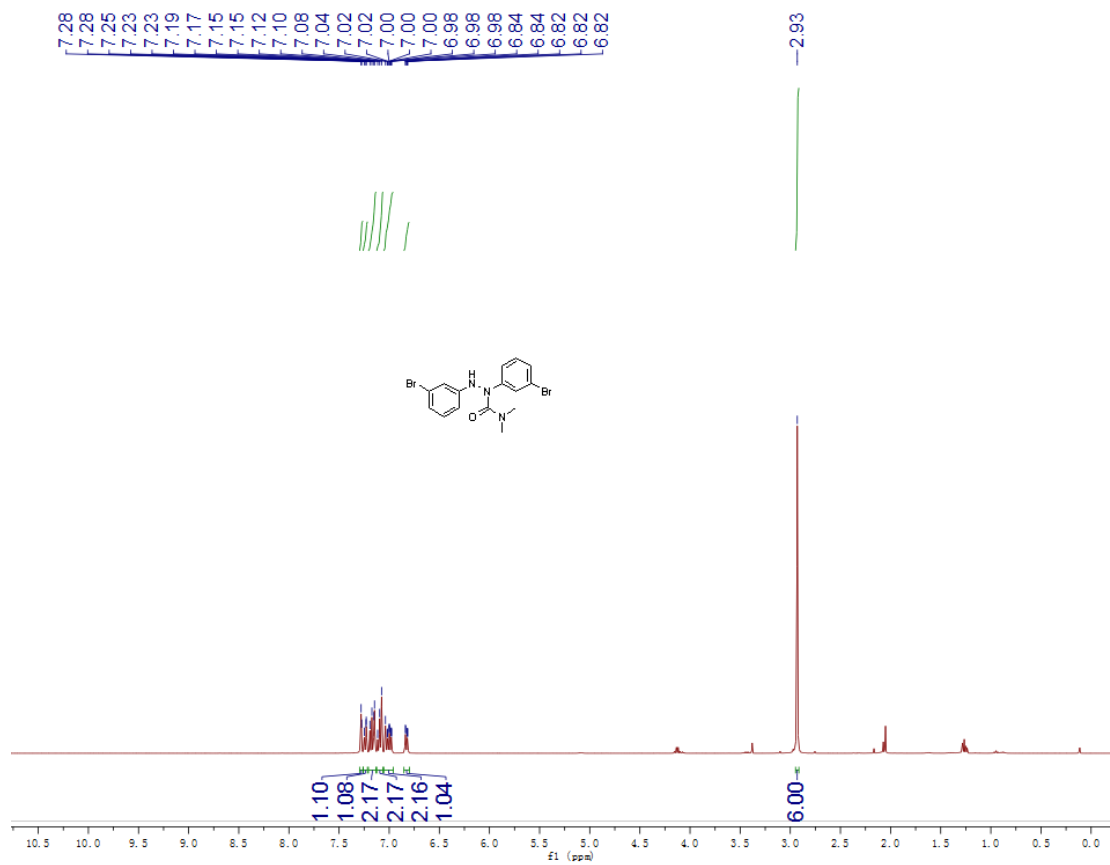

Chemical Shifts (ppm): 159.48, 149.83, 147.10, 130.53, 123.37, 123.32, 122.96, 118.51, 116.40, 112.27, -37.57

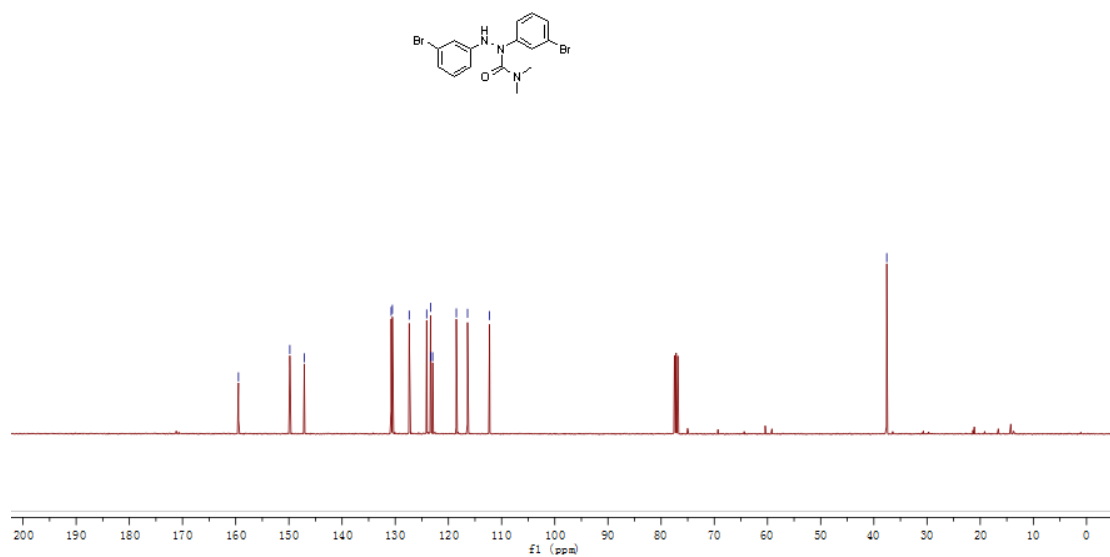

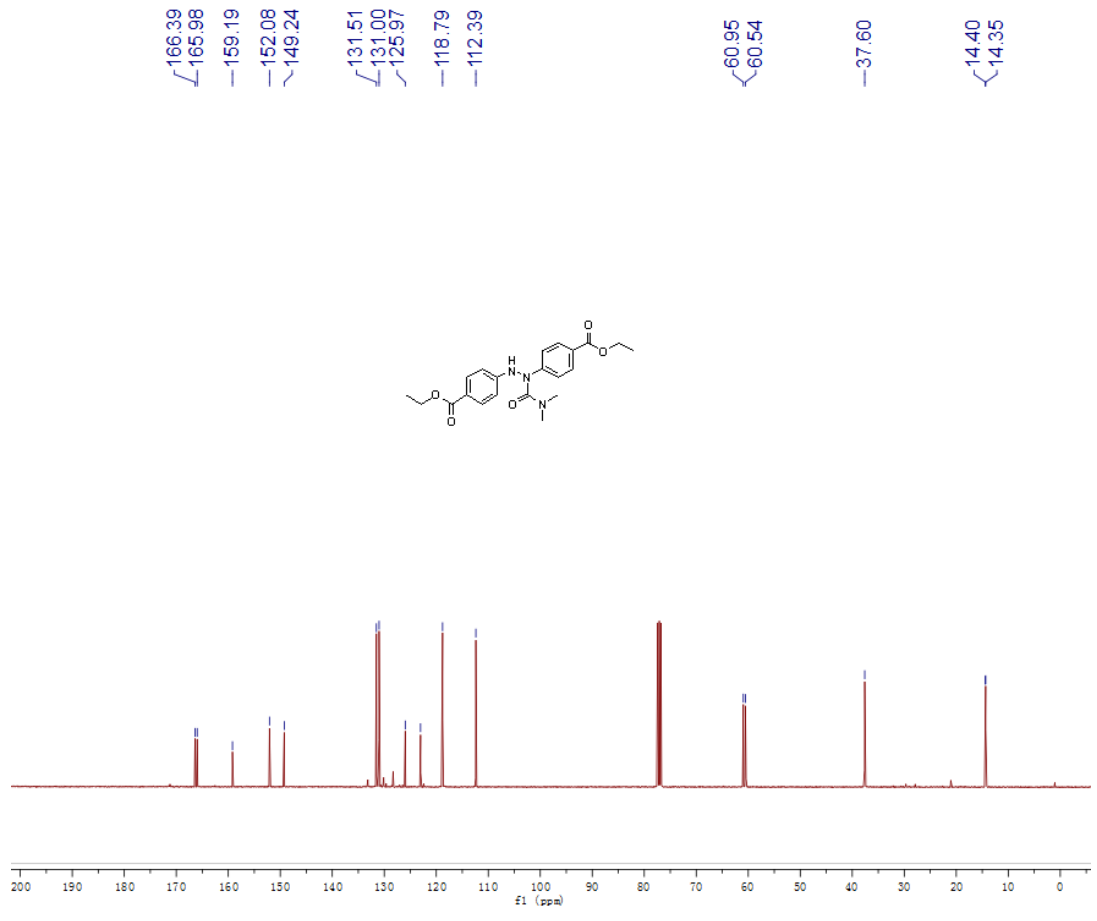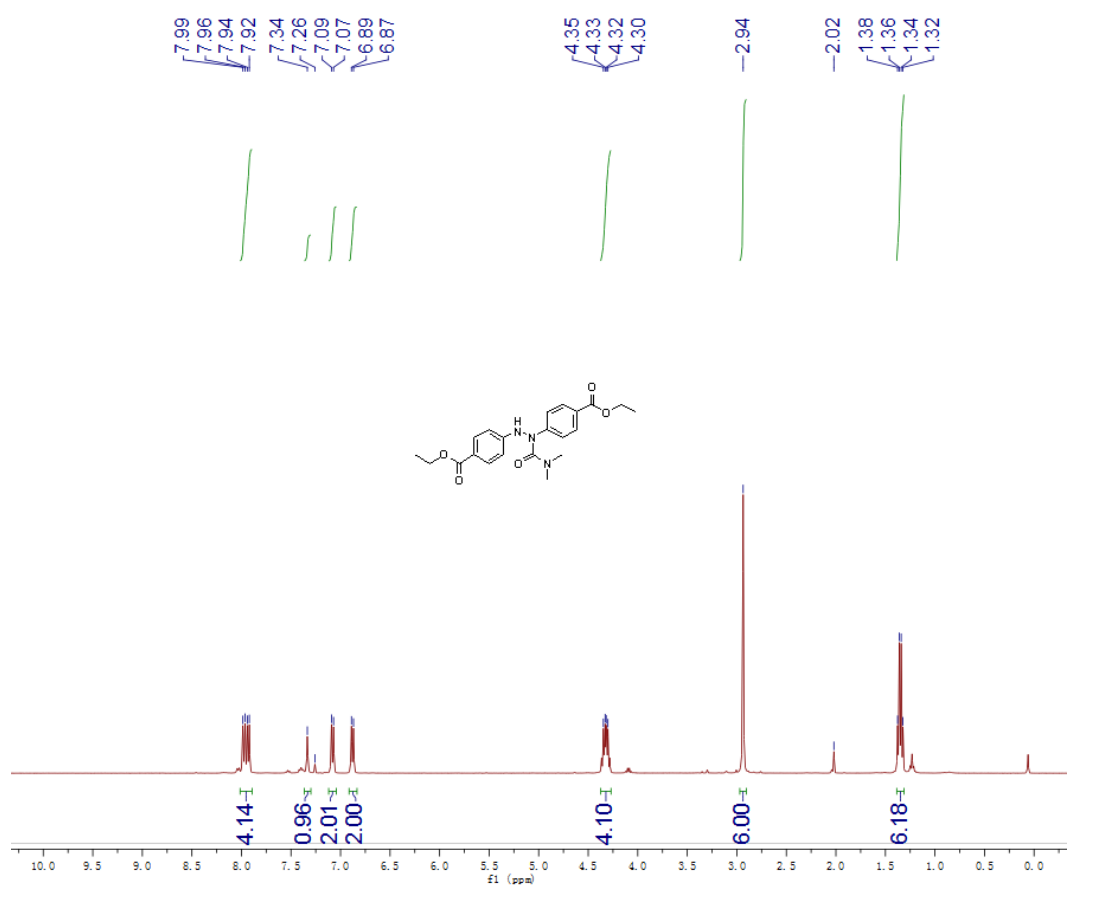

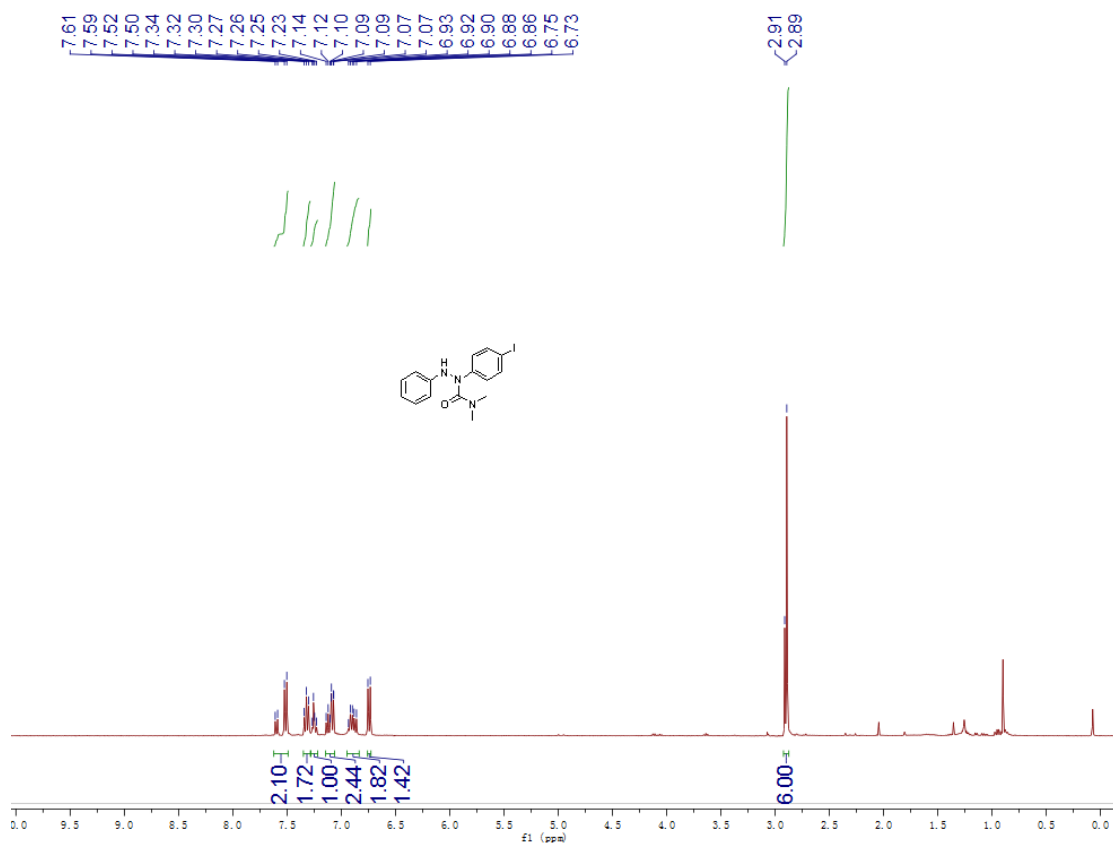

- 160.22
- 159.84
- 148.71
- 145.97
- 138.02
- 129.39
- 120.75
- 115.86
- 113.59
- 82.67
- 37.54
- 37.50

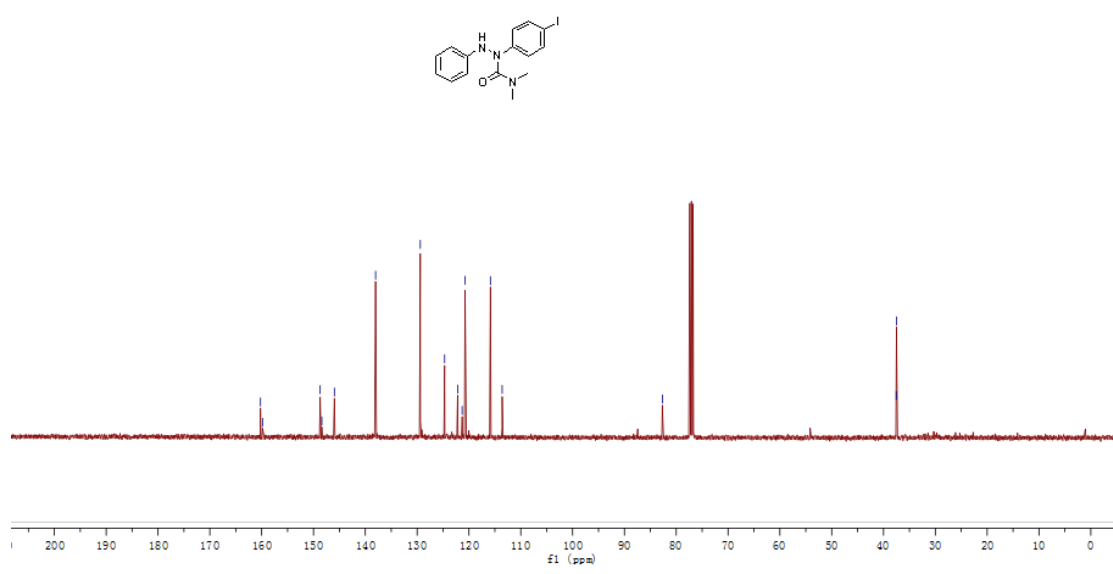

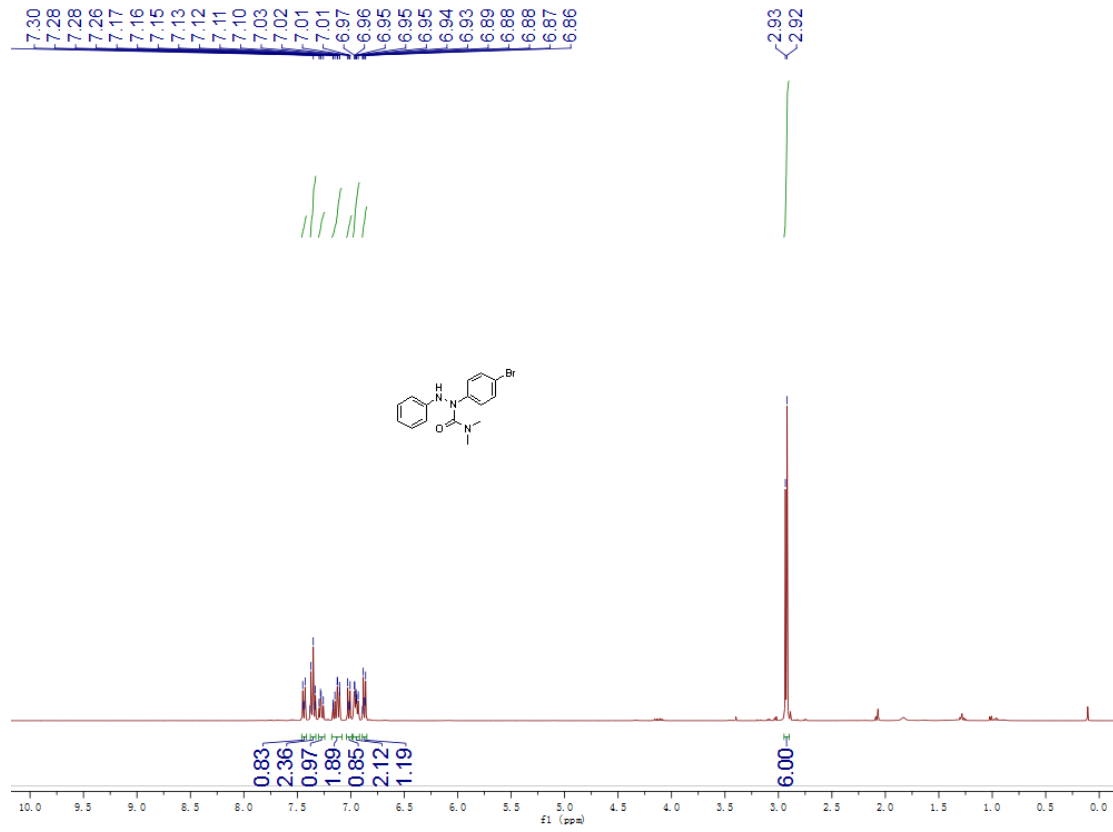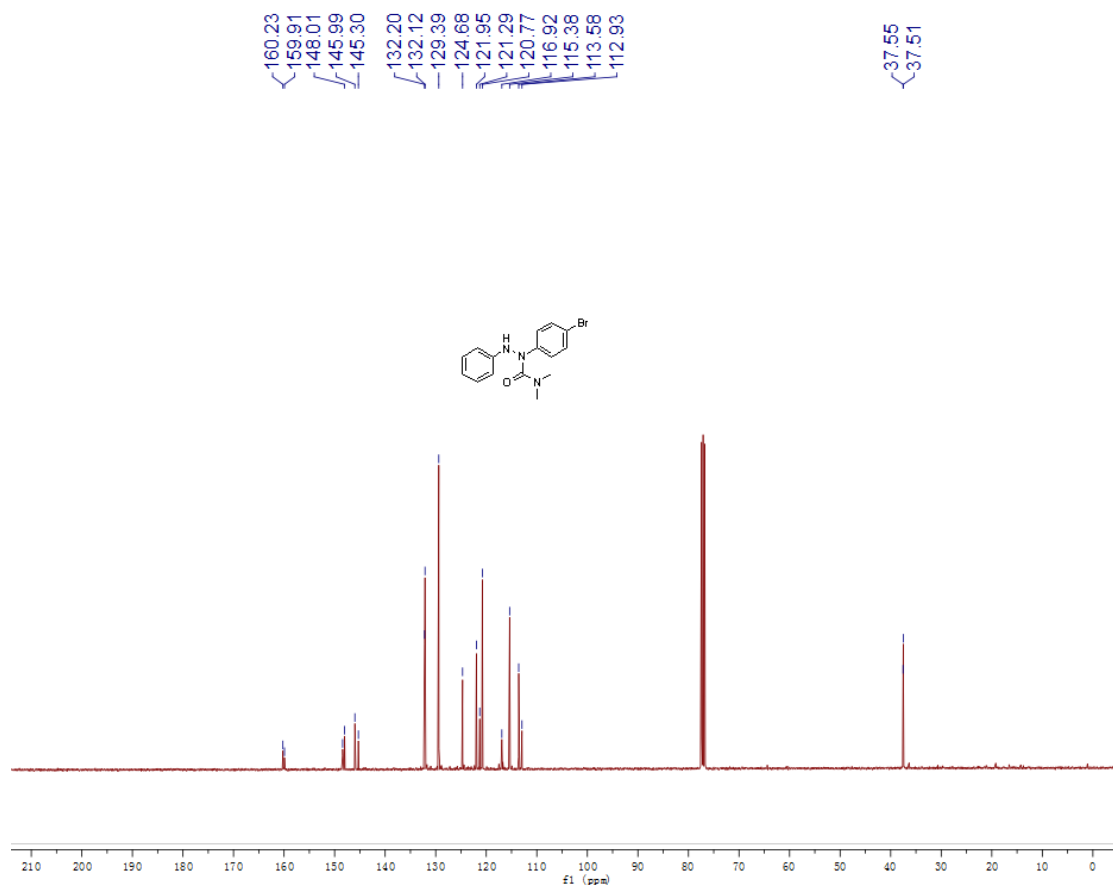



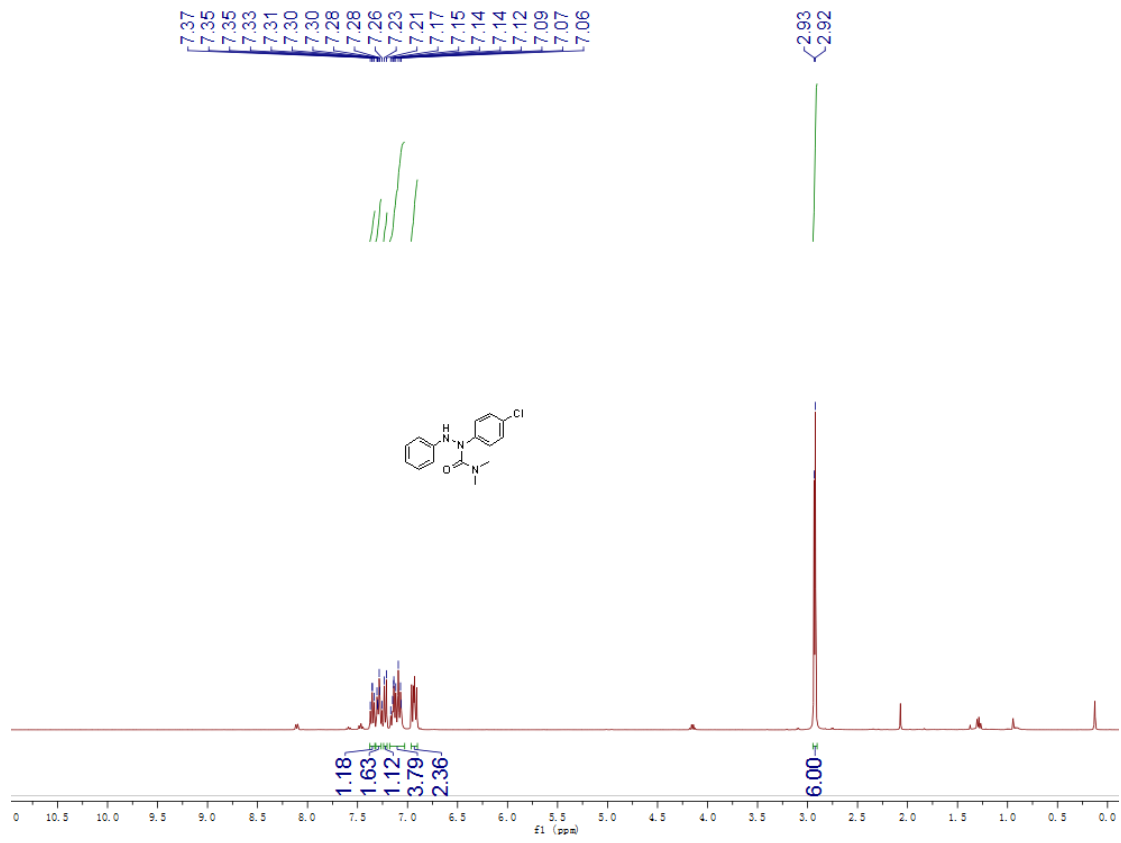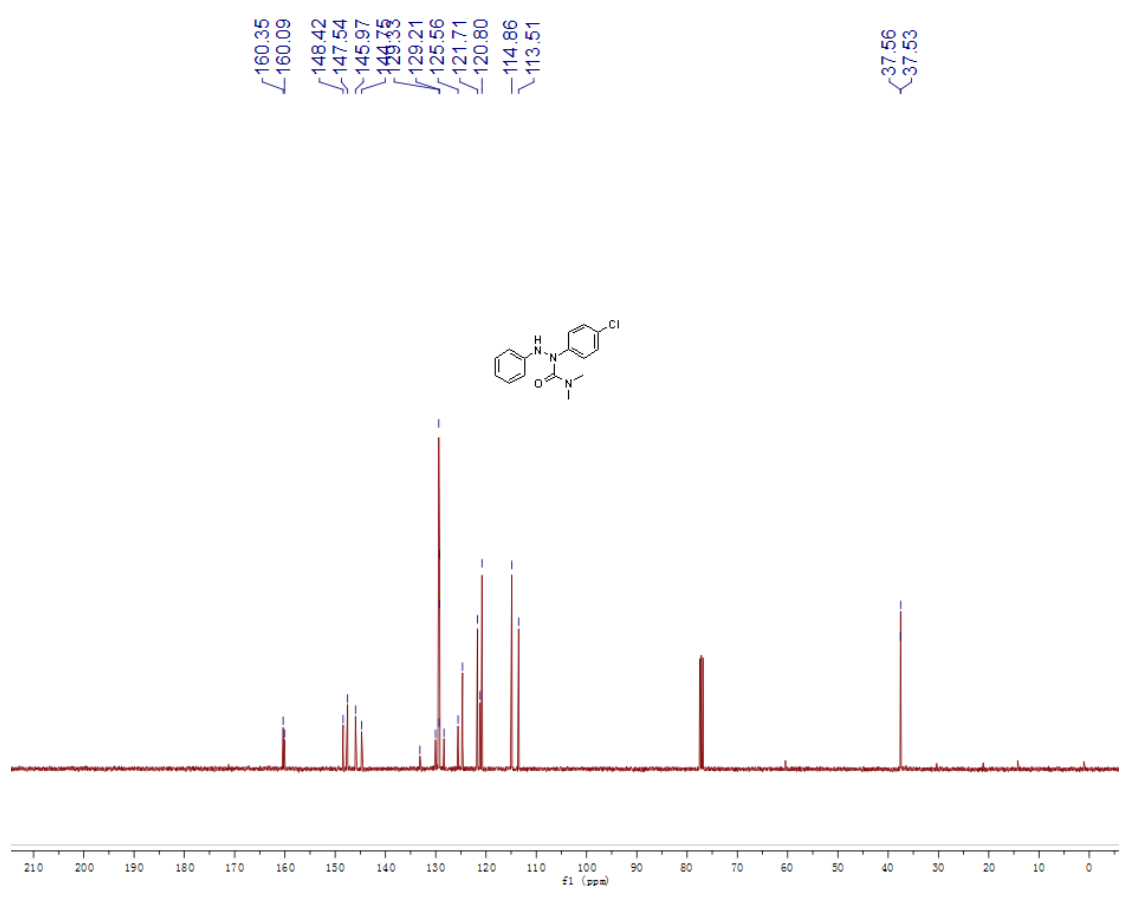

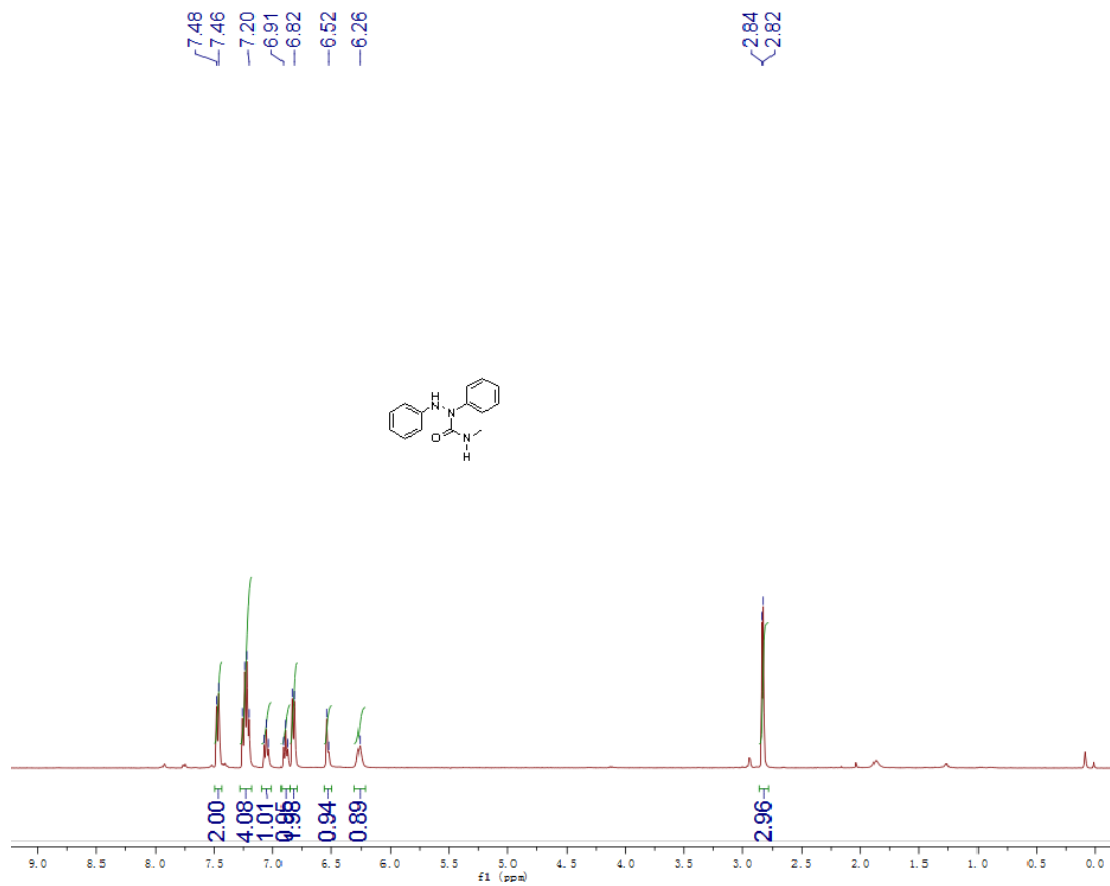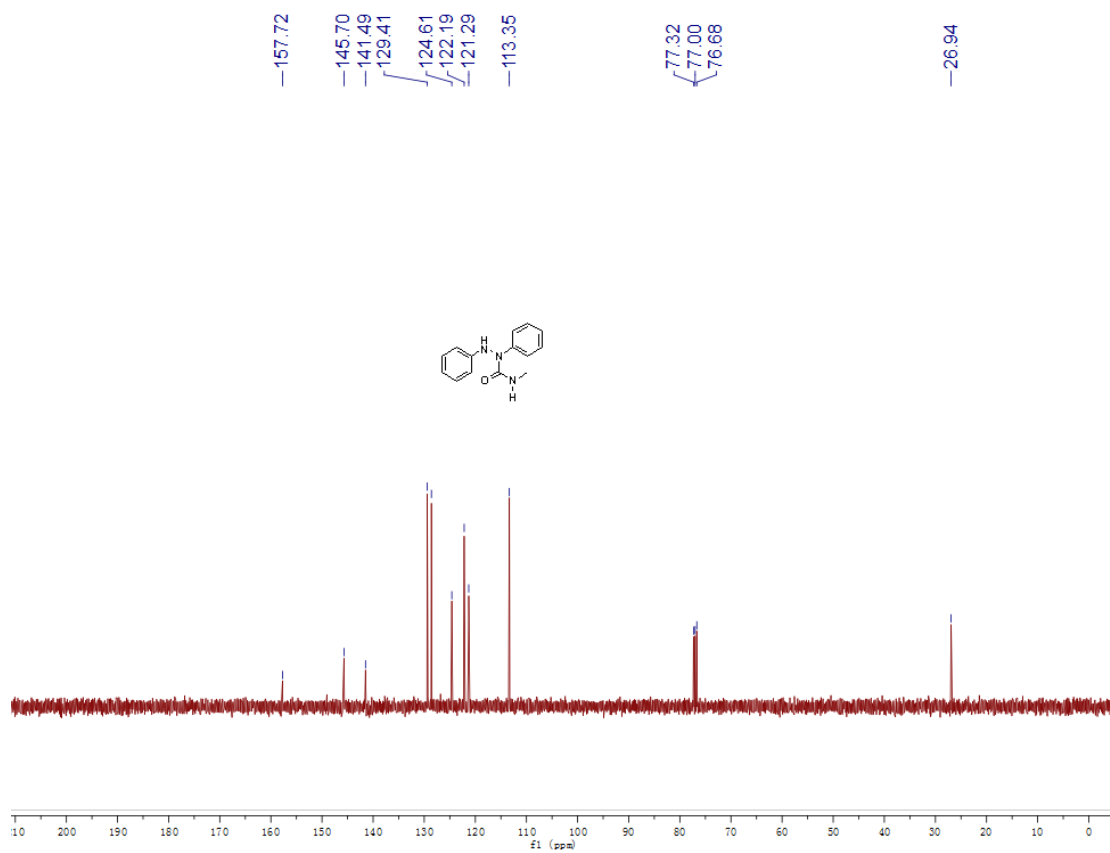

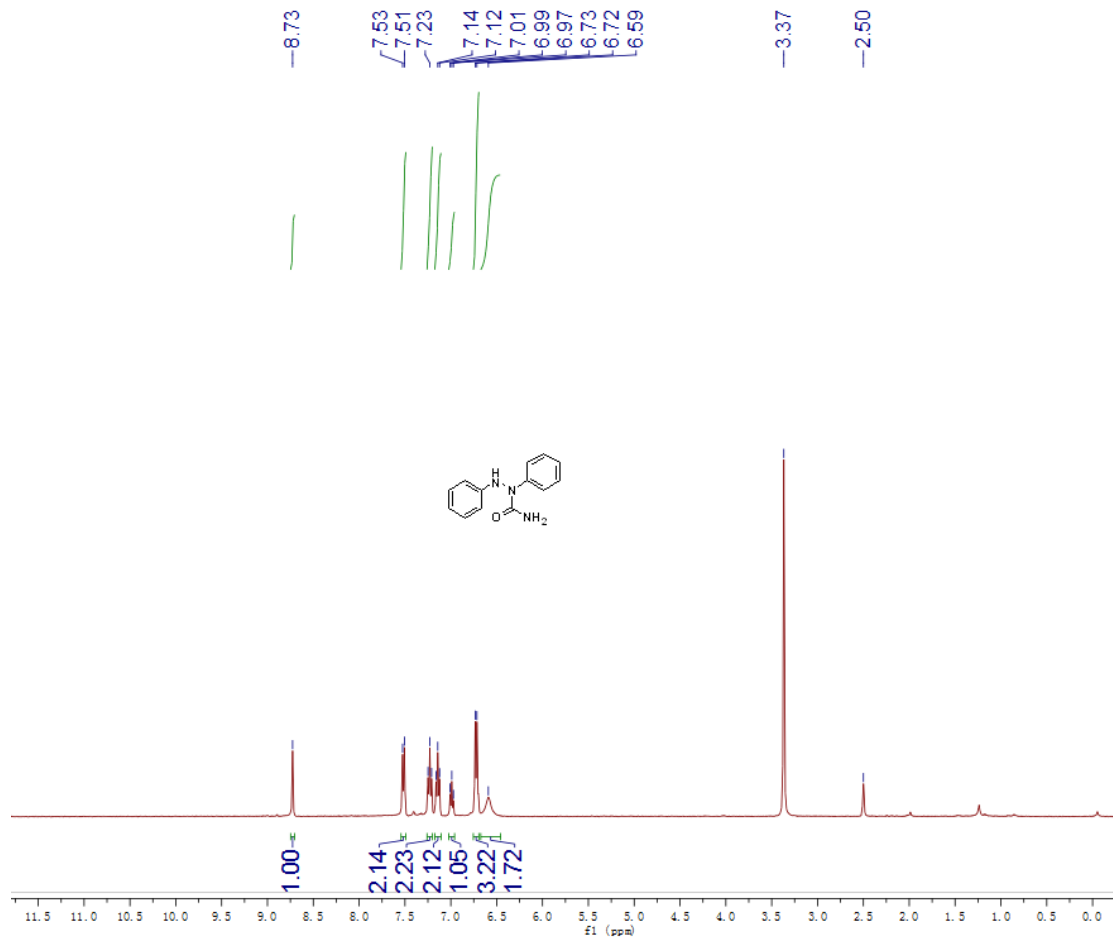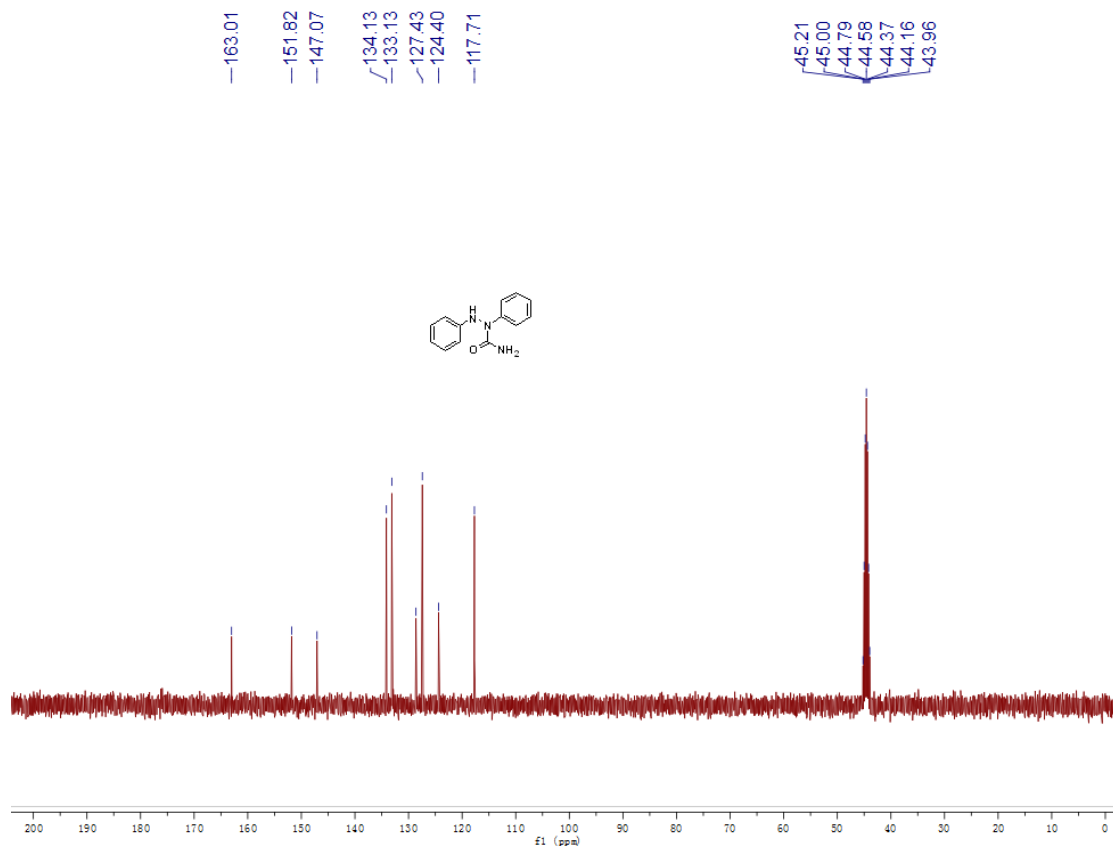

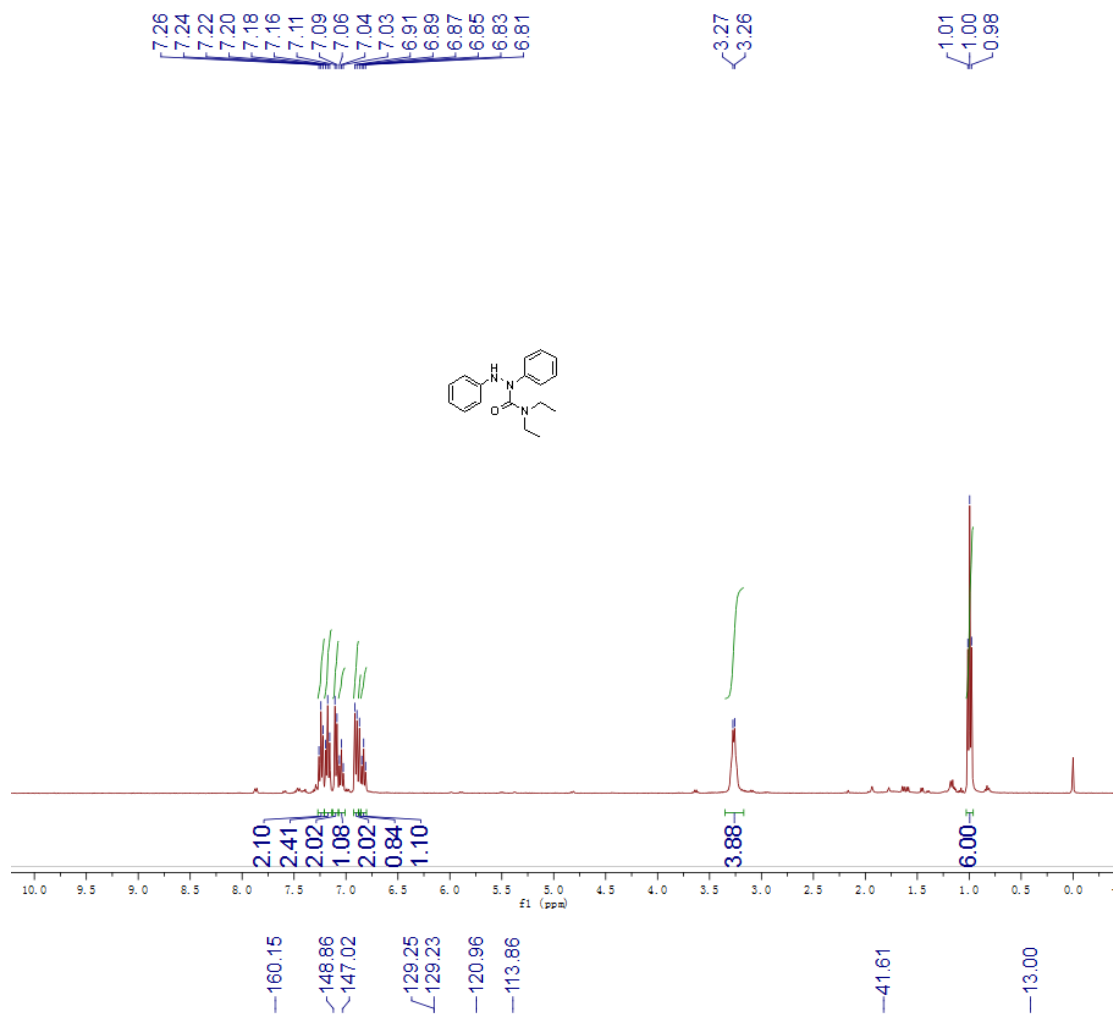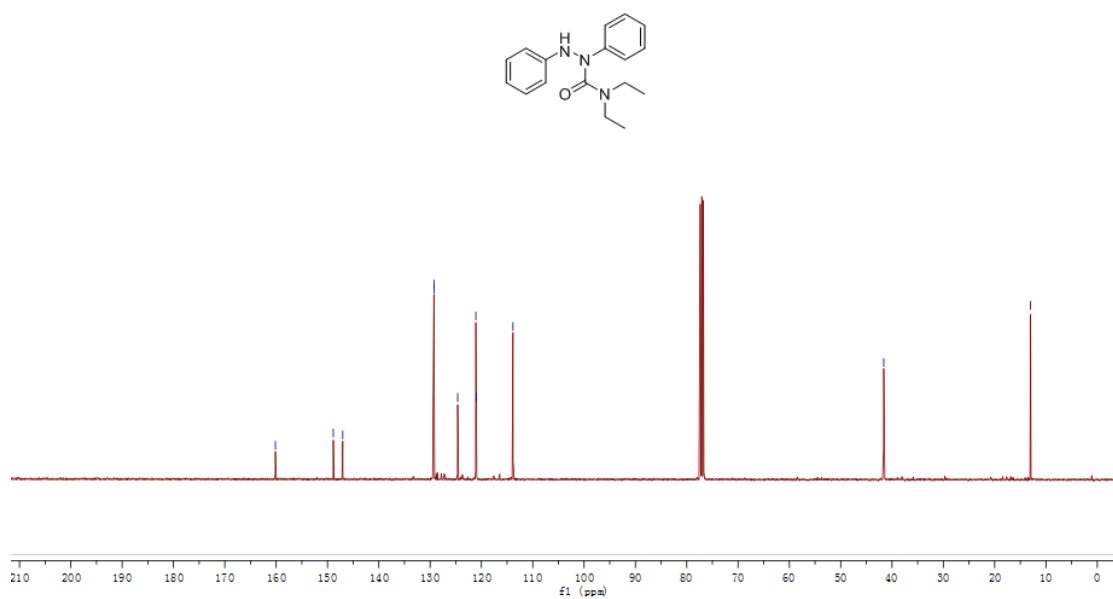

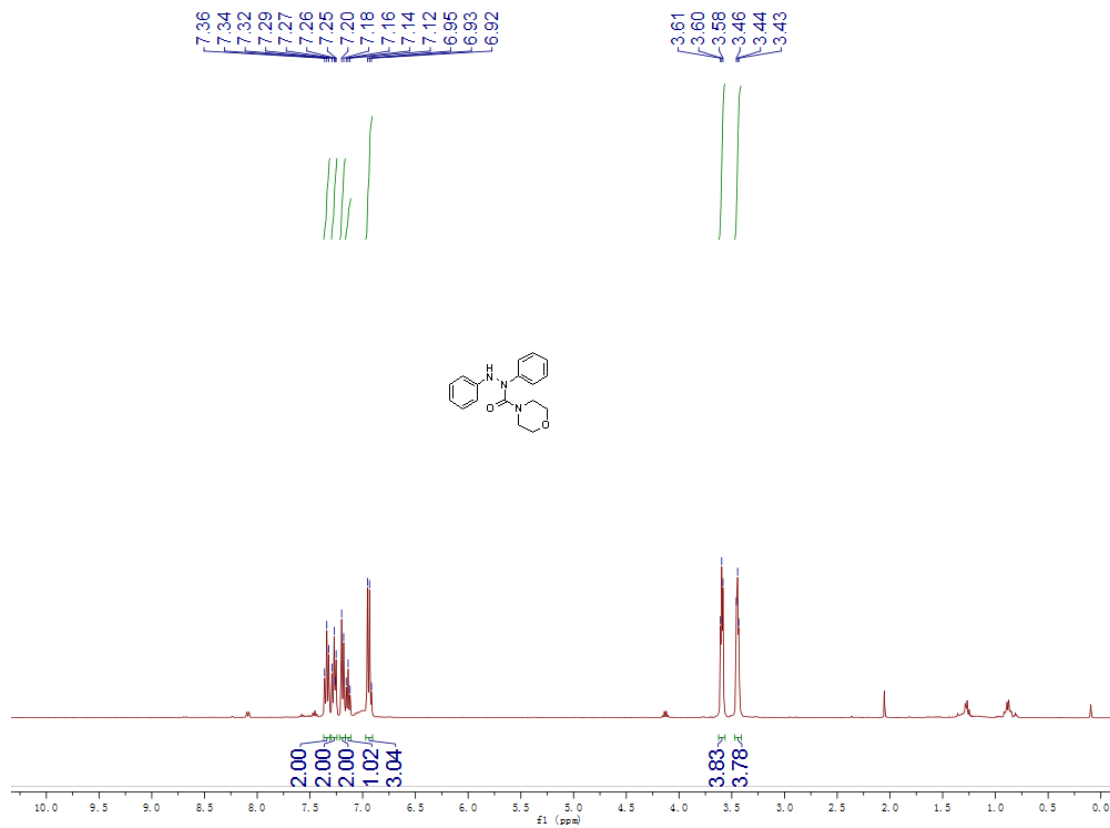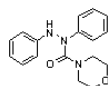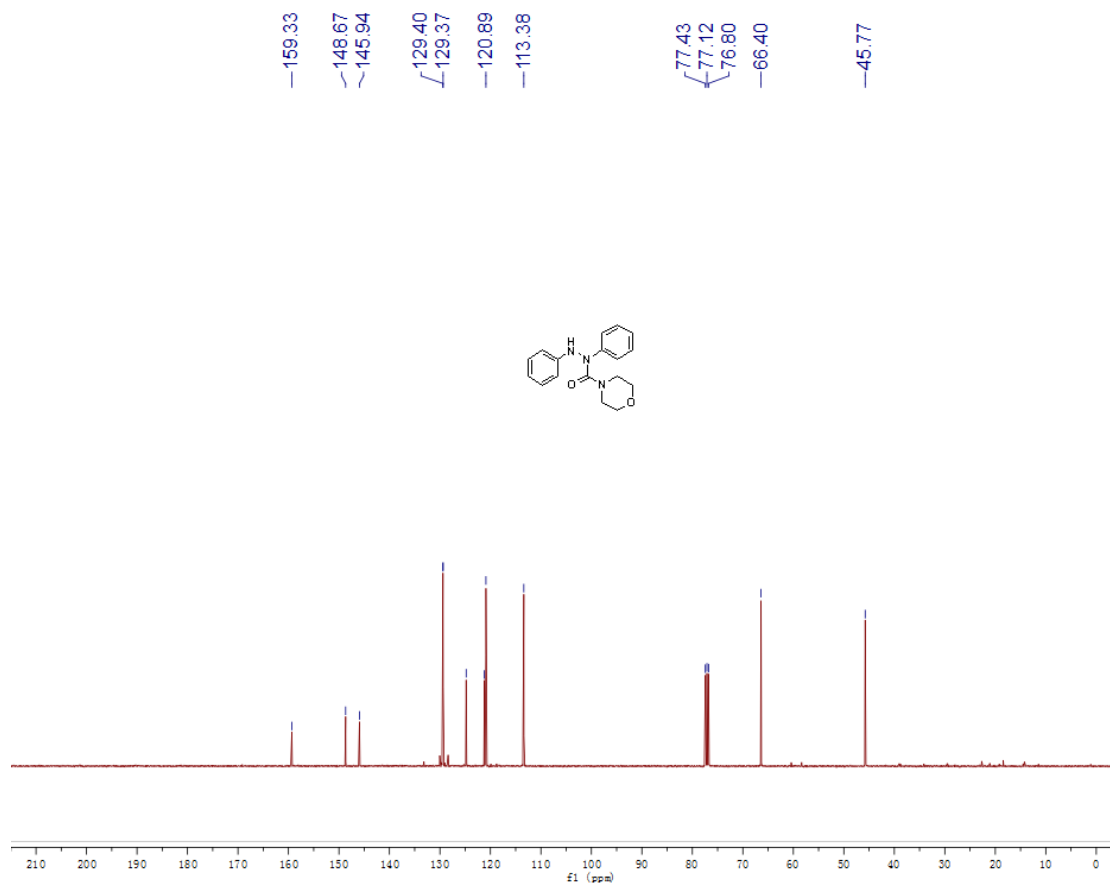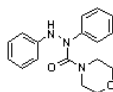

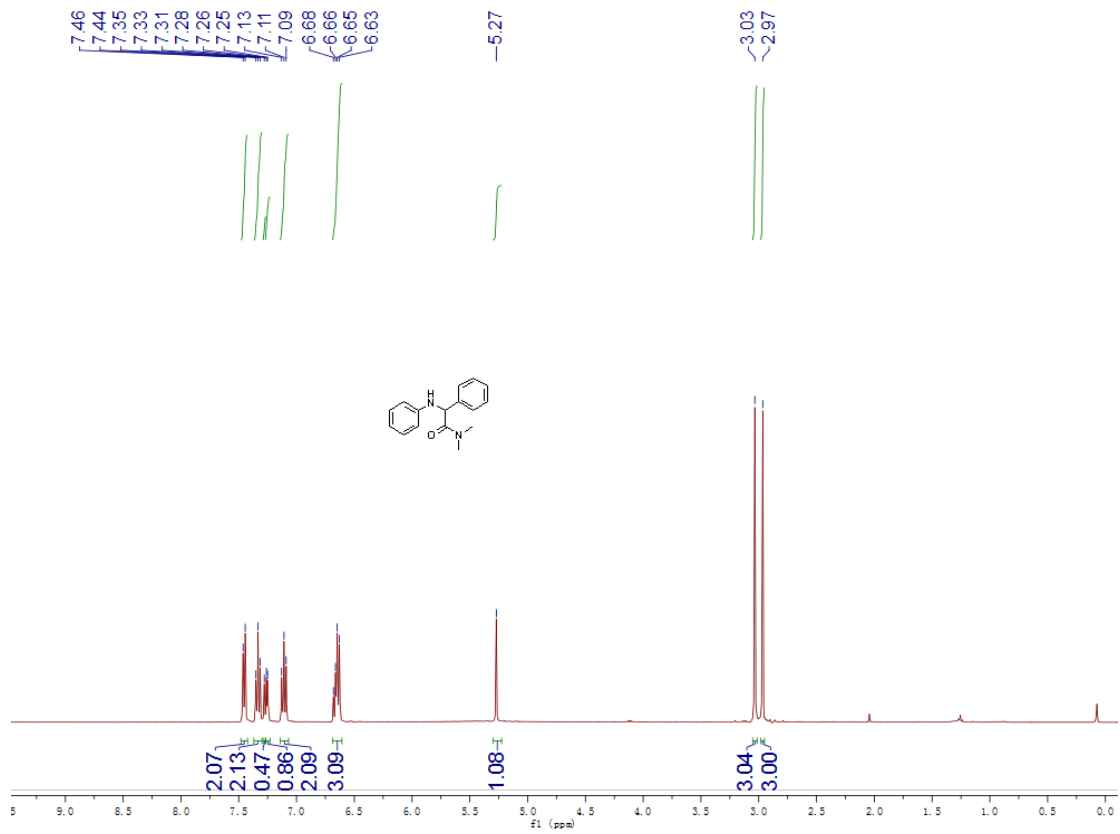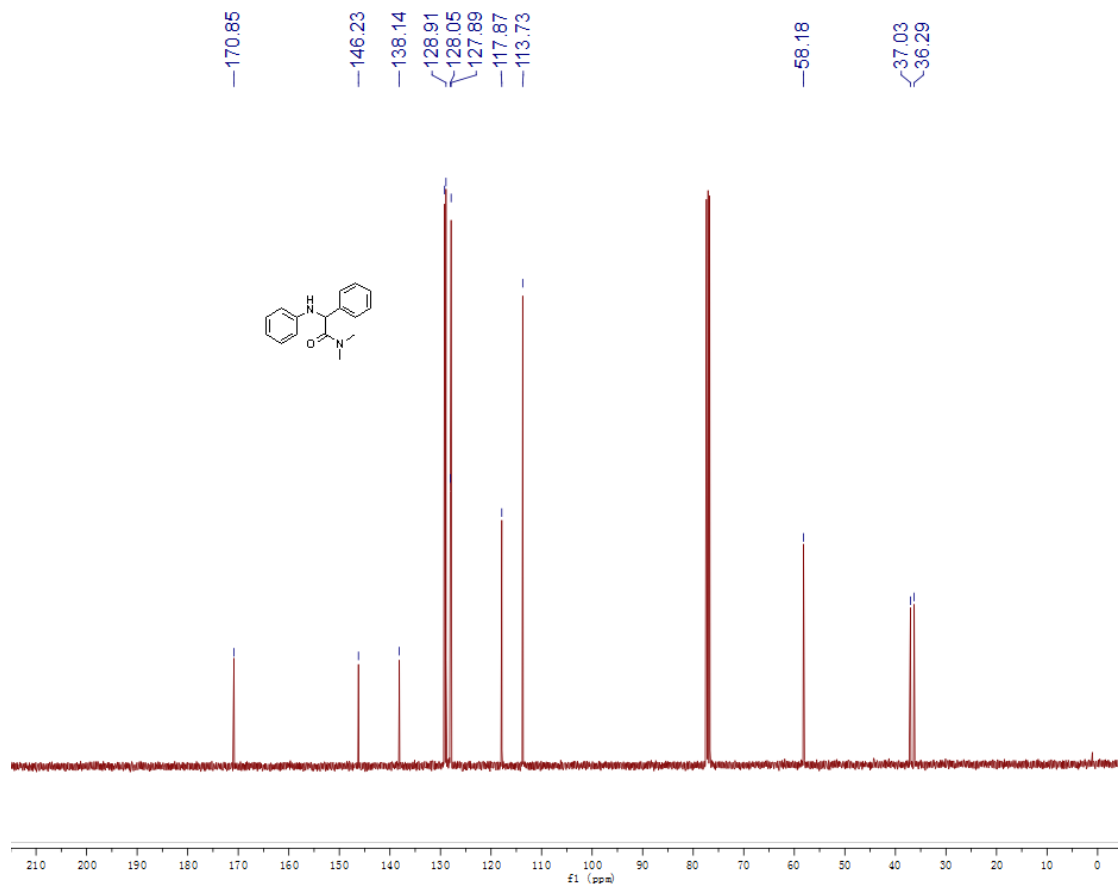

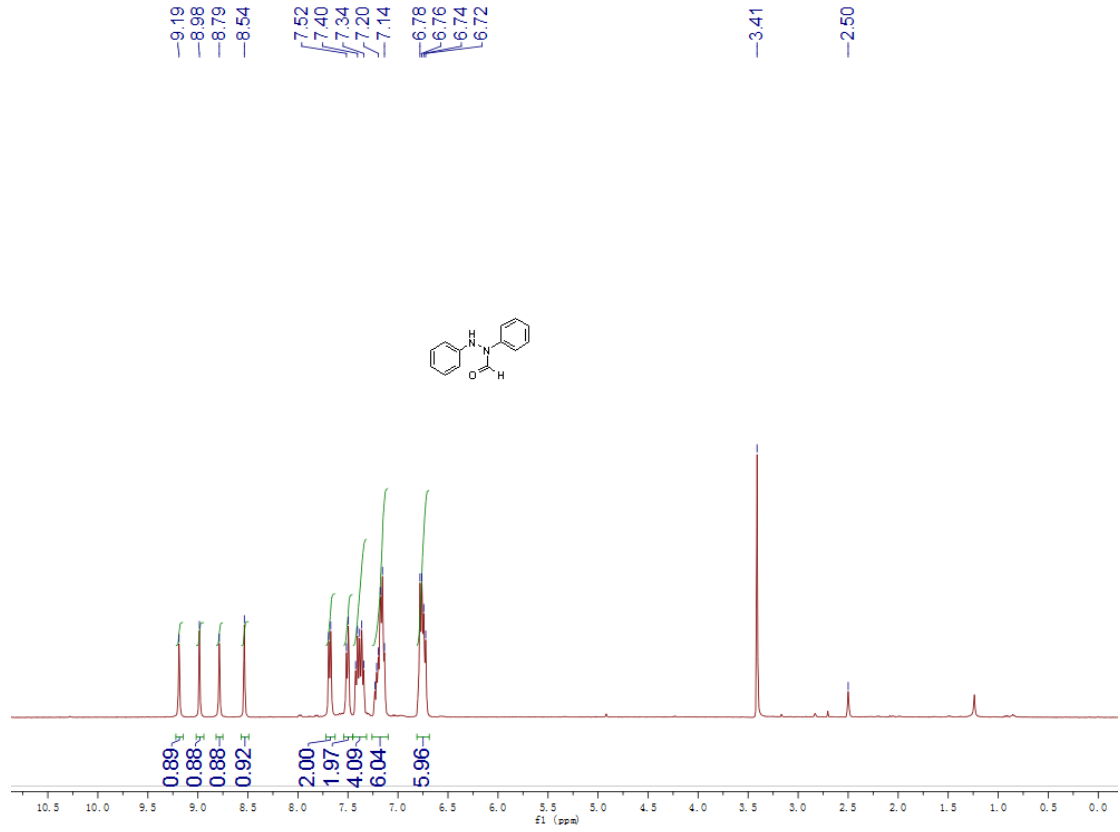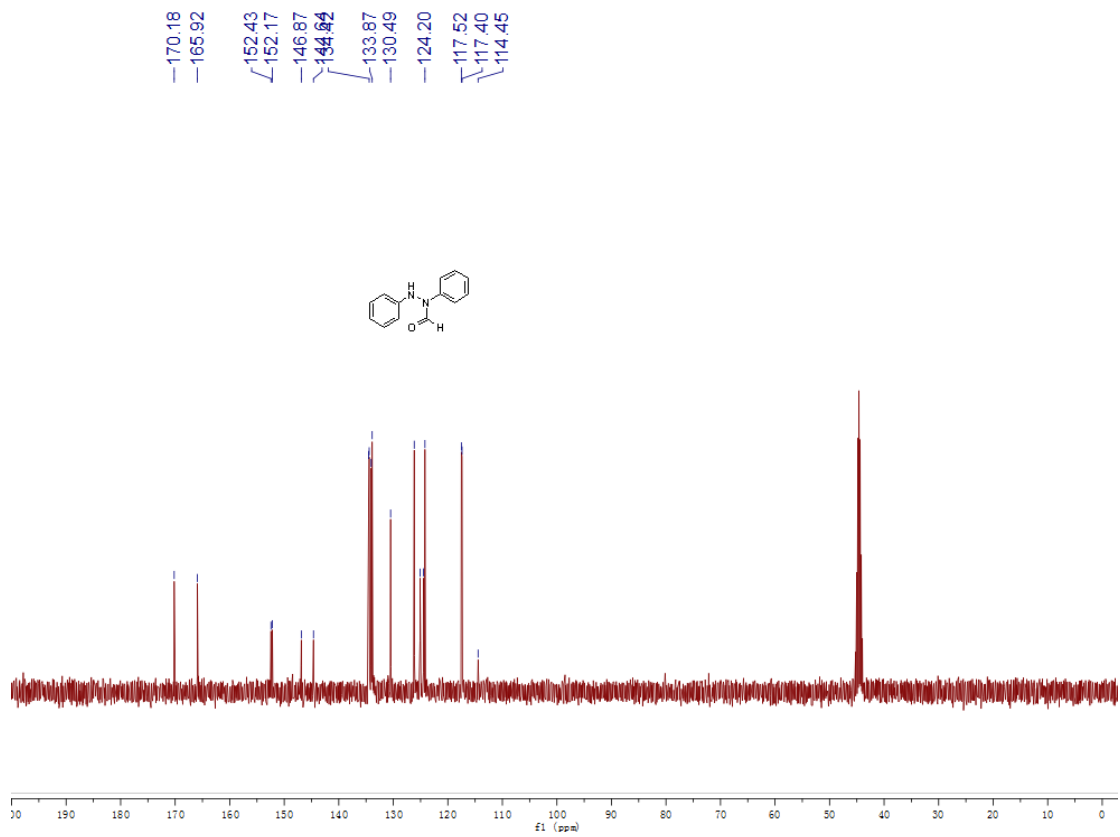

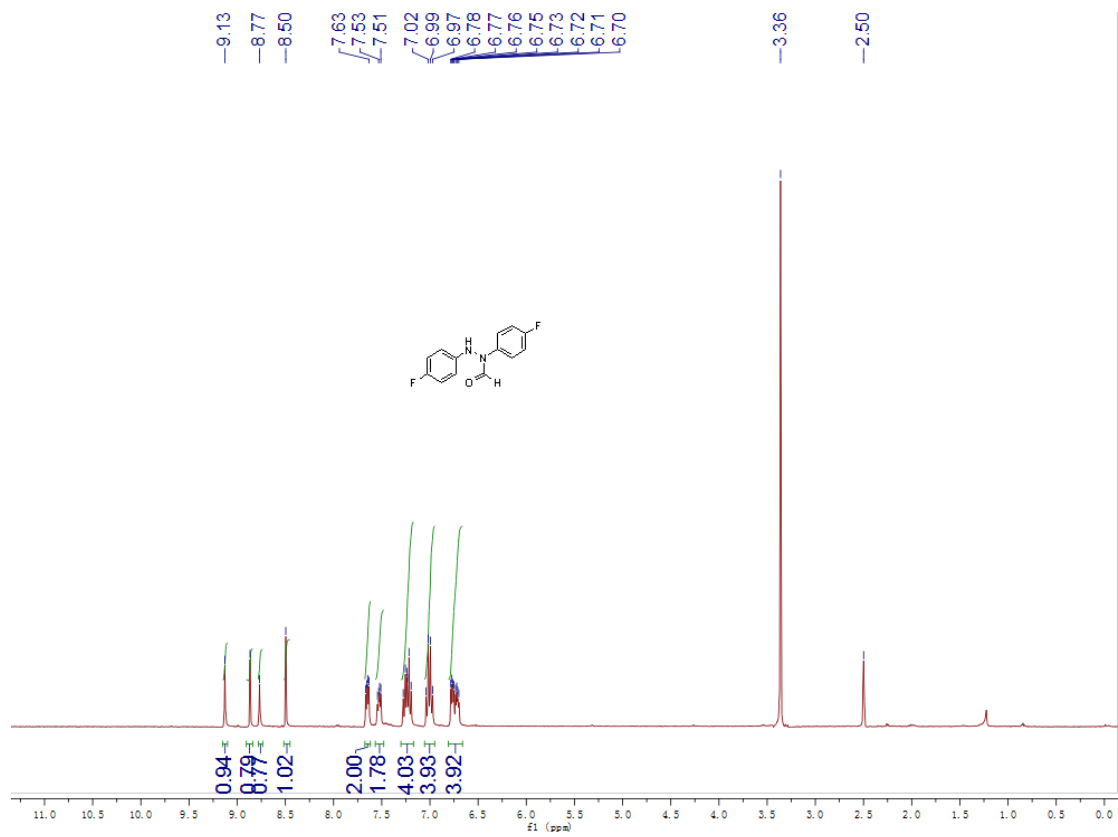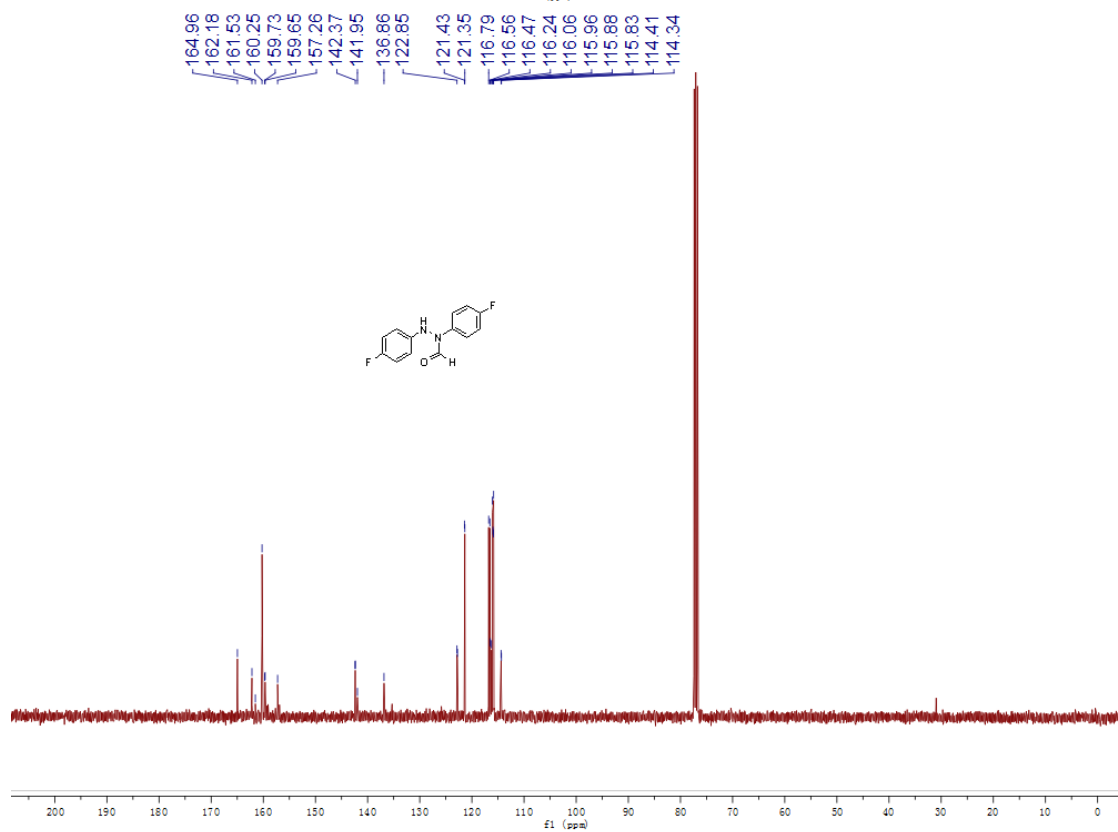



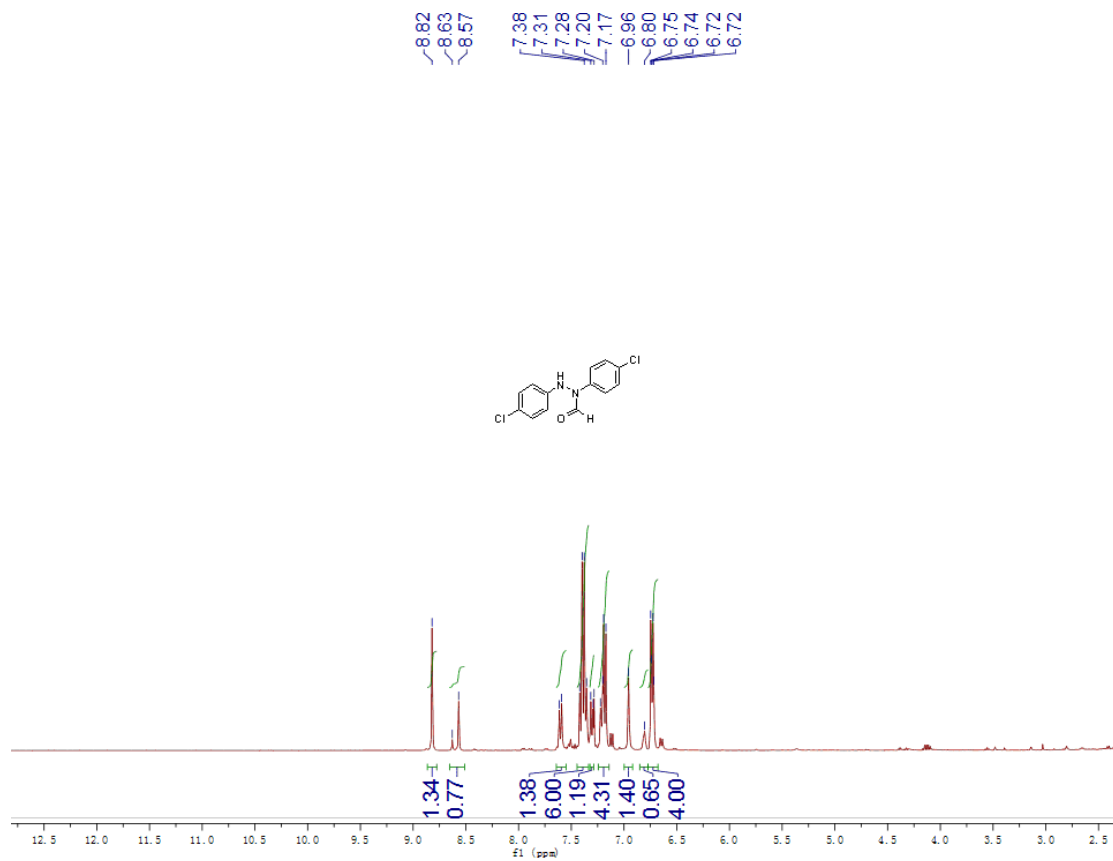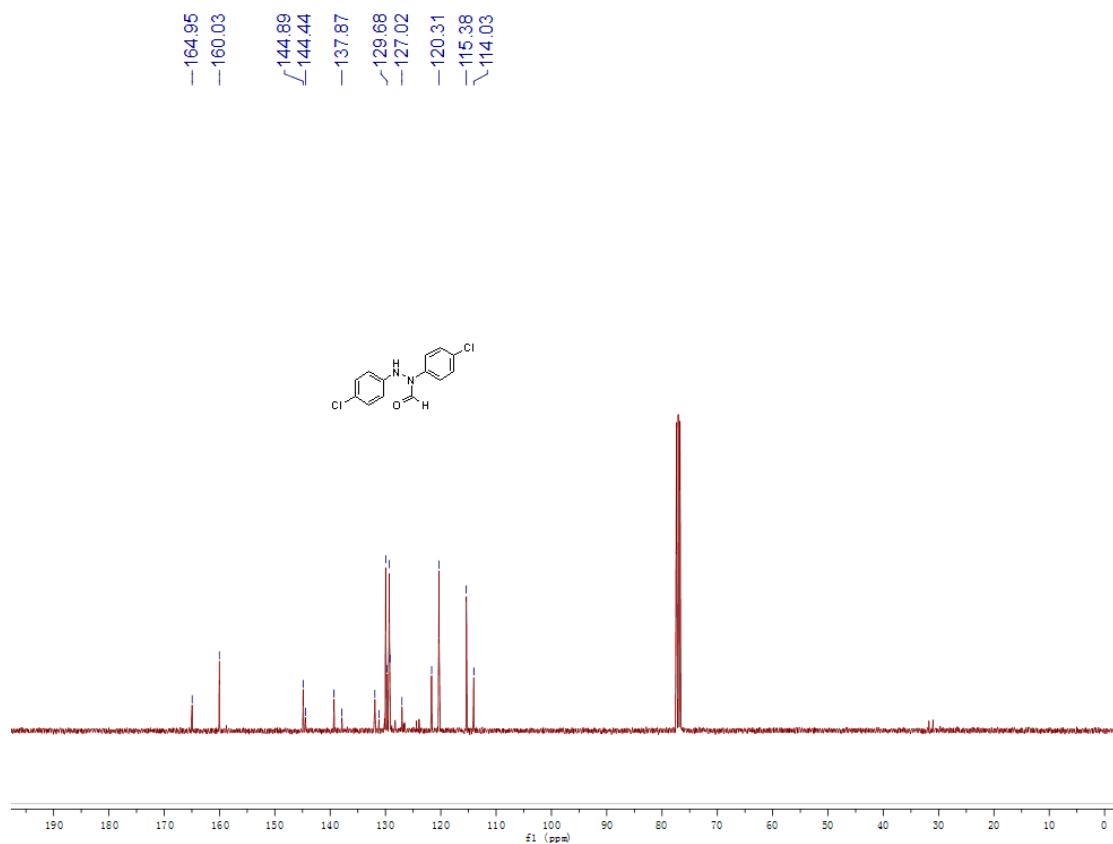

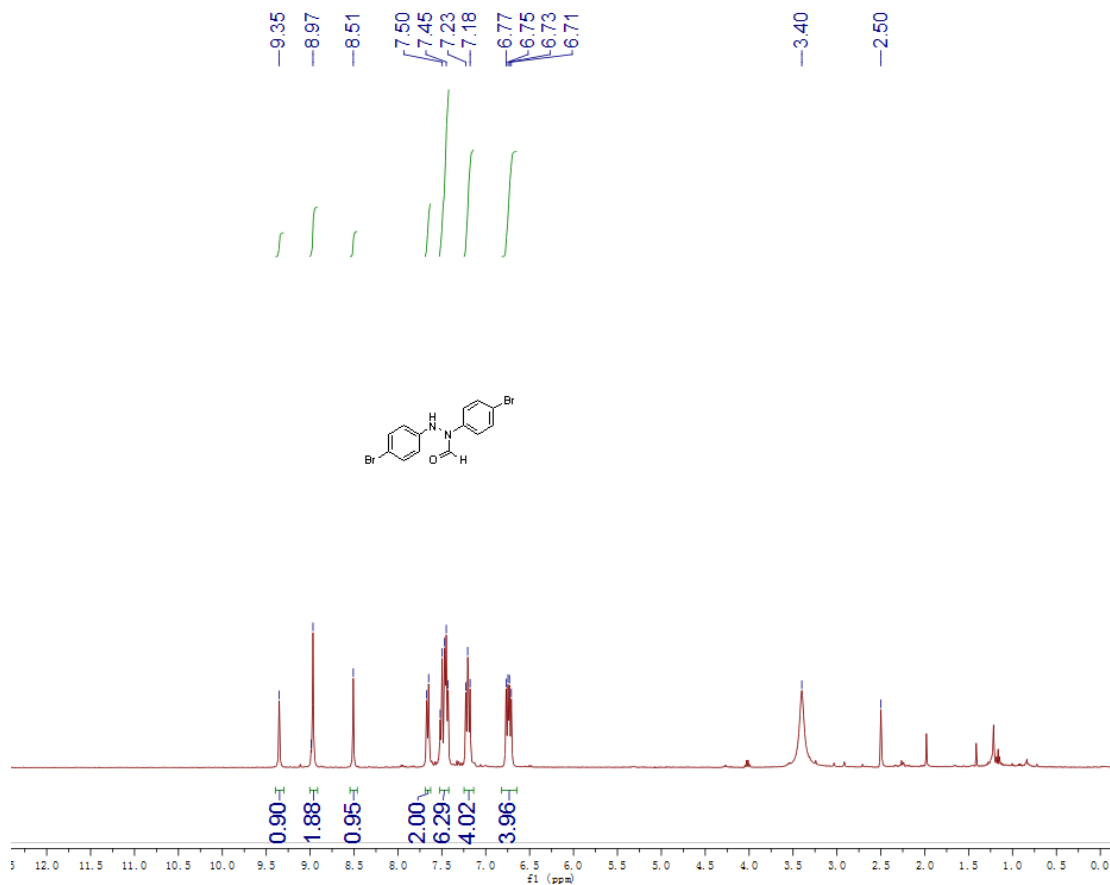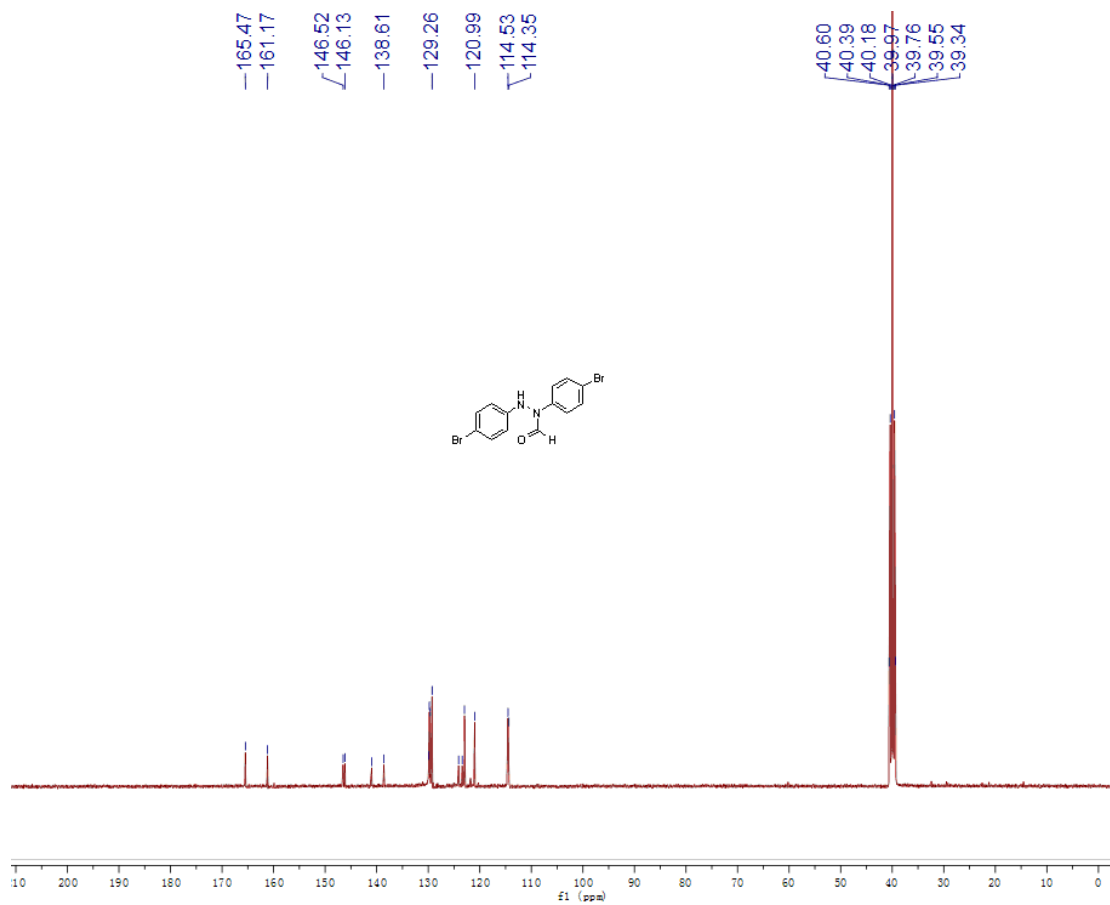

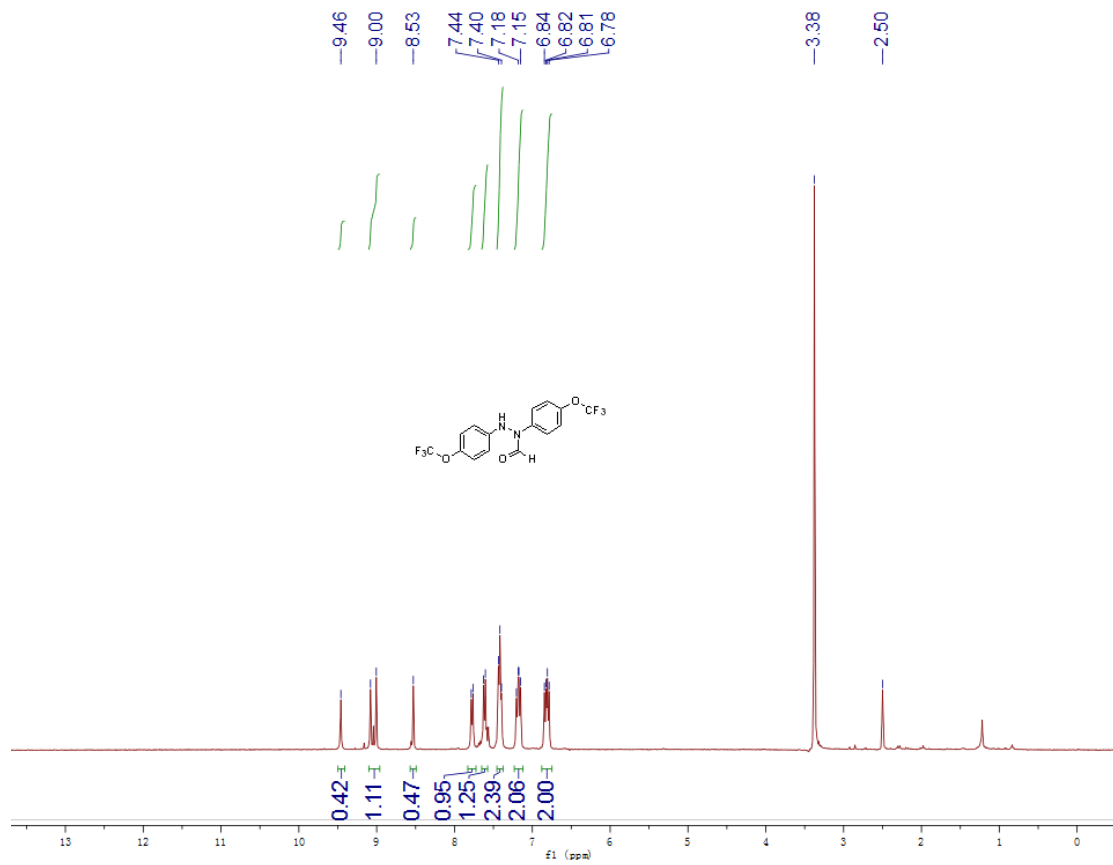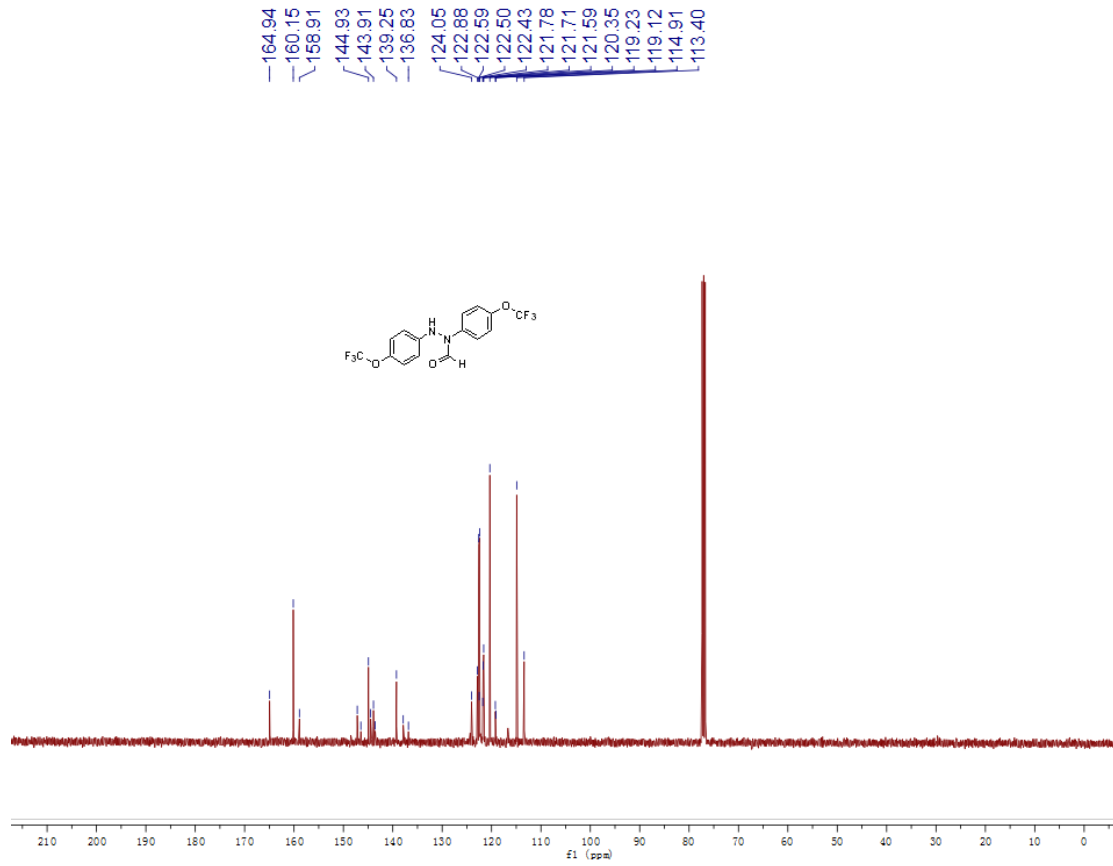

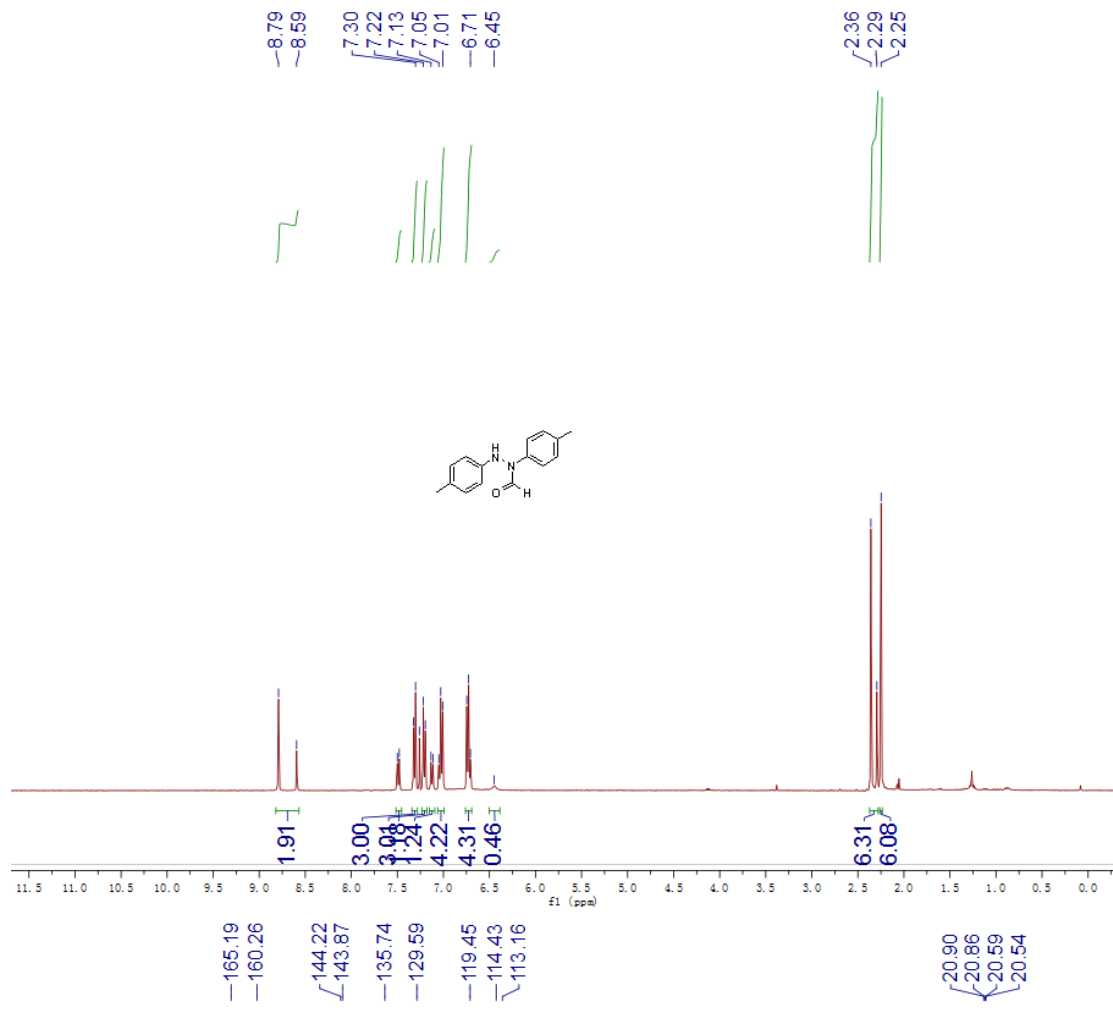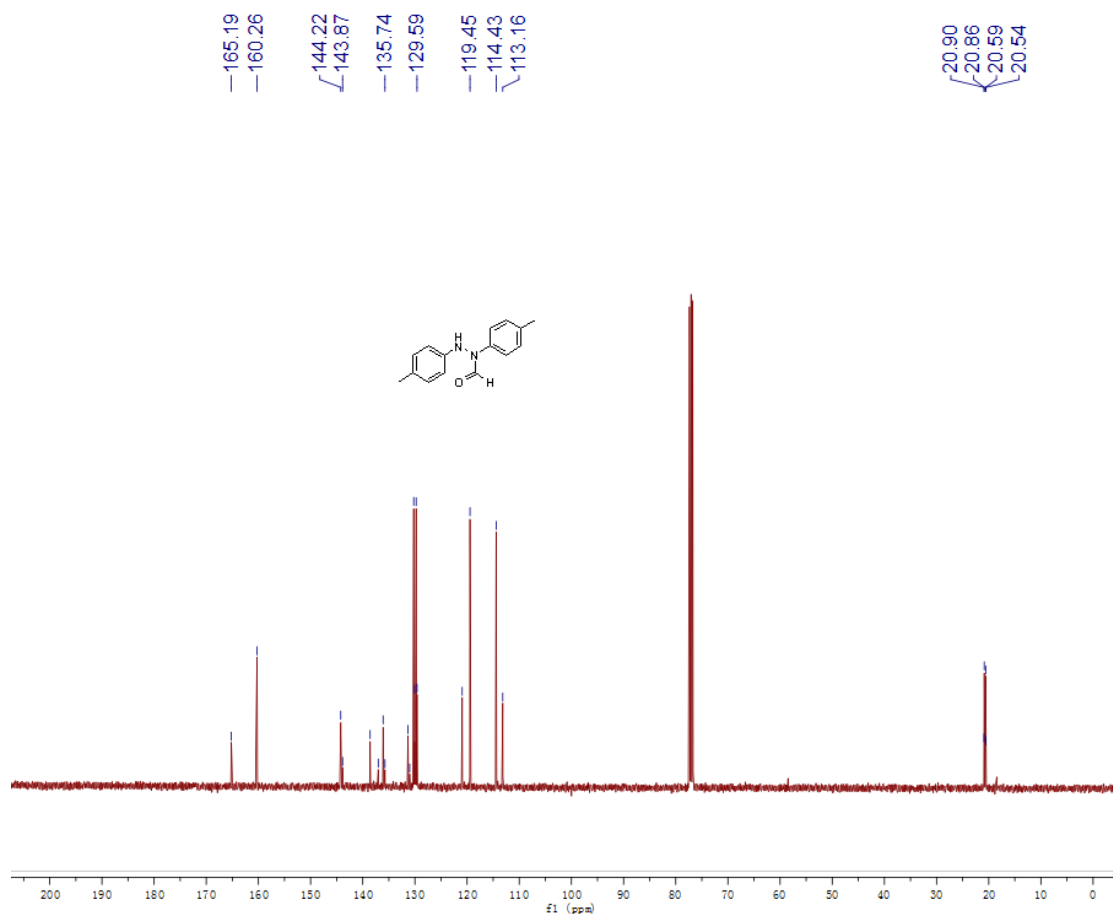

Supplement: c4ra17015f1.pdf [file c4ra17015f1.pdf]
